# Supplementary material for: Transcriptomic analysis of Bama pig's liver in various nutritional states reveals a metabolic difference of fatty acids
Source: Royal Society of Chemistry journal article supplement (doi:10.1039/c7fo00937b), 2017-01-01
Supplement: c7fo00937b2.xlsx [file c7fo00937b2.xlsx]

## Sheet: DEGs
Table S2 Differentially expressed genes of F/C group
Gene id	name	readcount Fast	readcount control	FoldChange	log2FoldChange	p-val
ENSSSCG00000010443		131.558	0.314068	418.882	8.7104	6.4851e-23
Novel00369		140.497	1.01103	138.967	7.1186	2.2556e-06
ENSSSCG00000010442	LIPK	2028.84	16.4692	123.186	6.9447	6.8744e-38
ENSSSCG00000001045	ELOVL2	628.994	6.0061	104.728	6.7105	6.2865e-05
ENSSSCG00000028631		27.7965	0.375796	73.9665	6.2088	2.2045e-08
ENSSSCG00000027065		78.6864	1.14867	68.5032	6.0981	1.6312e-15
ENSSSCG00000022526		25.6645	0.38289	67.0284	6.0667	0.0025529
ENSSSCG00000024996		24.7292	0.375796	65.8038	6.0401	0.0061731
ENSSSCG00000003140		154.47	3.08771	50.0258	5.6446	0.00046595
Novel01453		37.302	0.942205	39.591	5.3071	5.8472e-09
Novel00538		92.2642	2.51421	36.6972	5.1976	0.030207
ENSSSCG00000027194	SULT1B1	1976.41	58.9657	33.5188	5.0669	1.1198e-10
ENSSSCG00000014861		48.338	1.45565	33.2066	5.0534	0.0045198
ENSSSCG00000007933		24.6821	0.751592	32.8404	5.0374	4.8398e-07
Novel00831		9.55113	0.314068	30.4105	4.9265	0.001309
Novel01717		9.38058	0.314068	29.8674	4.9005	0.011166
Novel00791		69.8069	2.45958	28.3819	4.8269	7.6183e-05
ENSSSCG00000007336		1833.84	67.2556	27.2673	4.7691	2.0055e-13
ENSSSCG00000006013	AARD	9.84994	0.375796	26.211	4.7121	0.010075
Novel01918		37.6778	1.57034	23.994	4.5846	0.00047134
ENSSSCG00000011256		15.0153	0.628137	23.9043	4.5792	0.00065024
ENSSSCG00000024236	MMP17	22.1966	1.01103	21.9538	4.4564	0.038806
ENSSSCG00000012993	SLC25A45	66.4118	3.05603	21.7313	4.4417	2.7908e-11
Novel01395		6.6795	0.314068	21.2678	4.4106	0.014674
Novel01093		20.5176	1.00393	20.4368	4.3531	2.4076e-05
ENSSSCG00000004530		5.98272	0.314068	19.0497	4.2517	0.020738
ENSSSCG00000002297		6.57836	0.375796	17.5051	4.1297	0.040354
ENSSSCG00000015068		37164.1	2171.83	17.1116	4.0969	2.2947e-07
ENSSSCG00000010947		11.7804	0.689865	17.076	4.0939	0.025148
Novel01006		660.467	38.7719	17.0346	4.0904	0.014418
ENSSSCG00000011291	CCDC13	25.7152	1.51028	17.0264	4.0897	3.6403e-06
ENSSSCG00000006243	PENK	11.6498	0.696959	16.7153	4.0631	0.0010283
Novel01005		102.217	6.22675	16.4157	4.037	0.0040235
ENSSSCG00000014834		17.366	1.07275	16.1885	4.0169	0.00011498
ENSSSCG00000000061		2311.78	150.002	15.4122	3.946	5.663e-18
ENSSSCG00000003900	DMBX1	32.7418	2.2673	14.441	3.8521	0.00051233
Novel01847		31.5306	2.22852	14.1487	3.8226	0.006282
Novel00737		9.62582	0.689865	13.953	3.8025	0.0051079
ENSSSCG00000023186		82.8285	6.23173	13.2912	3.7324	0.017612
ENSSSCG00000017098	C5orf49	14.6365	1.14158	12.8216	3.6805	0.00039918
Novel00353		132.001	10.396	12.6969	3.6664	1.2292e-05
Novel02233		4.80207	0.38289	12.542	3.6487	0.043743
Novel02253		64.8567	5.45719	11.8844	3.571	1.9396e-08
ENSSSCG00000002700	SYCE1L	7.98687	0.689865	11.5771	3.5332	0.014413
ENSSSCG00000011078	ARMC3	11.6459	1.01103	11.5187	3.5259	0.018635
ENSSSCG00000015747		65.175	5.67618	11.482	3.5213	0.031292
Novel00451		22.5738	2.08378	10.8333	3.4374	6.7238e-05
ENSSSCG00000002277	SPTB	50.543	4.73564	10.673	3.4159	1.7497e-07
ENSSSCG00000002013		24179.6	2276.14	10.6229	3.4091	1.1786e-14
ENSSSCG00000016521	DGKI	10.4113	1.01103	10.2981	3.3643	0.0092754
ENSSSCG00000030712		138.803	13.5191	10.2674	3.36	1.4454e-06
ENSSSCG00000022033		76.1569	7.57644	10.0519	3.3294	0.023325
ENSSSCG00000017636	LPO	6.24534	0.628137	9.94244	3.3136	0.042402
ENSSSCG00000004678		207.922	21.4655	9.68599	3.2759	0.0014157
Novel01307		10.4031	1.07985	9.63377	3.2681	0.02177
Novel00766		36.5839	3.86059	9.47614	3.2443	1.3563e-05
ENSSSCG00000010992		307.75	32.4967	9.47023	3.2434	1.094e-08
Novel00494		43.1771	4.60509	9.37618	3.229	0.00043629
Novel01376		23.4441	2.5284	9.27212	3.2129	0.00079722
ENSSSCG00000003547	NCMAP	20.8366	2.26187	9.21191	3.2035	0.00018569
Novel00180		75.6244	8.4865	8.91108	3.1556	0.02092
ENSSSCG00000006716		35577.3	4053.3	8.77744	3.1338	1.7404e-12
Novel01955		46.9878	5.47681	8.57954	3.1009	0.00011001
Novel01247		18.2198	2.13842	8.52028	3.0909	0.042387
ENSSSCG00000013171		8400.53	1000.8	8.39366	3.0693	2.3653e-08
ENSSSCG00000000576		21831.4	2652.89	8.22947	3.0408	1.5323e-08
Novel01901		143.619	17.5032	8.20555	3.0366	5.0849e-09
ENSSSCG00000016286	PRSS56	55.8973	7.10678	7.86529	2.9755	8.6433e-07
ENSSSCG00000025783	ENTPD3	109.025	14.8071	7.36303	2.8803	0.029266
ENSSSCG00000004676	DUOXA2	35.4712	4.87162	7.28132	2.8642	4.0994e-05
Novel01590		75.7675	10.5724	7.16666	2.8413	7.54e-06
Novel01293		17.5298	2.46667	7.1068	2.8292	0.0015502
ENSSSCG00000009937		189.61	26.7555	7.08663	2.8251	2.3419e-06
ENSSSCG00000017947		21.3552	3.01346	7.08663	2.8251	0.029097
Novel00238		52.9769	7.54264	7.02355	2.8122	2.1677e-05
ENSSSCG00000000132	TEX33	132.033	19.0064	6.94657	2.7963	1.0797e-05
ENSSSCG00000014900	RAB30	127.495	18.3586	6.94464	2.7959	1.1034e-05
ENSSSCG00000016156		5031.48	728.965	6.90241	2.7871	1.277e-10
ENSSSCG00000011641		209.911	31.6921	6.62353	2.7276	0.0016047
ENSSSCG00000025500	HTR1D	24.4026	3.79886	6.42368	2.6834	0.0030258
Novel00767		363.66	57.2114	6.35636	2.6682	6.1502e-09
Novel01572		11.7399	1.88607	6.22468	2.638	0.024701
ENSSSCG00000015067		51970	8360.98	6.21563	2.6359	1.0668e-09
Novel00580		795.629	128.388	6.19713	2.6316	0.00034089
ENSSSCG00000028817		14.0048	2.27606	6.15304	2.6213	0.0051569
Novel01528		84.4995	13.9583	6.05363	2.5978	2.3291e-06
Novel00496		76.3931	12.6966	6.01682	2.589	6.3387e-05
ENSSSCG00000017507		704.963	119.196	5.91427	2.5642	1.3738e-08
ENSSSCG00000016878		18.7008	3.16363	5.91099	2.5634	0.0026231
ENSSSCG00000020972		4314.48	729.936	5.91058	2.5633	2.3335e-09
ENSSSCG00000005467	HSDL2	7713.16	1316.47	5.85878	2.5506	2.3386e-09
ENSSSCG00000015303		12.1939	2.08378	5.85188	2.5489	0.038885
Novel01406		8.02207	1.37973	5.81428	2.5396	0.047938
ENSSSCG00000004194		168.812	29.1446	5.79215	2.5341	0.0036788
ENSSSCG00000030146		10.4532	1.83854	5.68555	2.5073	0.014674
ENSSSCG00000003824		546.383	96.2943	5.67413	2.5044	0.041645
ENSSSCG00000006569	SLC27A3	329.872	58.5356	5.63533	2.4945	5.1714e-05
ENSSSCG00000027920		29.3179	5.22613	5.61	2.488	0.00091711
ENSSSCG00000004510		22940.6	4265.93	5.37774	2.427	4.4718e-05
ENSSSCG00000027221		24.2547	4.59799	5.27511	2.3992	0.0046261
ENSSSCG00000004675		27.0864	5.20485	5.20392	2.3796	0.016437
ENSSSCG00000003427	C1orf167	9.11164	1.76262	5.16941	2.37	0.039821
ENSSSCG00000024520		4071.52	791.995	5.14083	2.362	1.8492e-08
ENSSSCG00000017885	SMTNL2	49.1651	9.60725	5.11736	2.3554	9.2615e-05
ENSSSCG00000008237		5262.71	1033.04	5.09436	2.3489	7.8895e-08
ENSSSCG00000030311		8.96755	1.76262	5.08765	2.347	0.040723
Novel02526		274.703	55.742	4.92799	2.301	6.2039e-07
ENSSSCG00000025418		9.31838	1.90026	4.9038	2.2939	0.033743
ENSSSCG00000020784		14.7787	3.02599	4.88379	2.288	0.013424
ENSSSCG00000025992		181.709	37.2274	4.88108	2.2872	0.0024126
ENSSSCG00000028620		4733.68	971.334	4.8733	2.2849	5.9666e-06
ENSSSCG00000007837	HS3ST2	22.6731	4.65806	4.86756	2.2832	0.0032885
ENSSSCG00000005171		755.645	155.388	4.86284	2.2818	0.01284
ENSSSCG00000017464	KRT25	8.61671	1.77681	4.84938	2.2778	0.047955
ENSSSCG00000027710	PDZD3	38.1482	7.87089	4.84669	2.277	0.00038837
Novel00121		62.0755	12.8184	4.84266	2.2758	6.0874e-05
ENSSSCG00000002857	TDRD12	29.424	6.08202	4.83796	2.2744	0.0011732
ENSSSCG00000002853	C19orf12	141.473	29.6029	4.77897	2.2567	0.010544
ENSSSCG00000016368	FARP2	63.1893	13.374	4.72495	2.2403	3.9952e-05
ENSSSCG00000004017	FRMD1	777.495	164.849	4.71645	2.2377	0.02278
ENSSSCG00000006935	CLCA2	95.9391	20.5467	4.66928	2.2232	0.0047048
ENSSSCG00000029934		11.8416	2.59722	4.55926	2.1888	0.025784
Novel01409		64.7332	14.2336	4.5479	2.1852	6.4547e-05
Novel00500		79.8883	17.6092	4.53688	2.1817	0.0013974
ENSSSCG00000007975	HBZ	13.971	3.1019	4.50398	2.1712	0.021414
Novel02019		40.0375	8.9103	4.49338	2.1678	0.00052325
Novel01416		53.5635	11.9646	4.4769	2.1625	0.00037988
ENSSSCG00000025541	ELOVL6	676.576	151.718	4.45956	2.1569	4.6292e-07
ENSSSCG00000025188		1903.05	431.043	4.41496	2.1424	0.0002446
ENSSSCG00000023740		123.947	28.7454	4.31183	2.1083	0.013746
ENSSSCG00000008571		17065.9	3986.99	4.28026	2.0977	7.7859e-07
ENSSSCG00000001844		140.946	33.1565	4.25099	2.0878	0.006783
Novel01512		50.8459	12.1427	4.18724	2.066	0.0010231
ENSSSCG00000007932	ROGDI	1605.95	383.868	4.18347	2.0647	1.0329e-06
ENSSSCG00000007980		696.996	168.526	4.1359	2.0482	3.4975e-06
Novel00537		12.0652	2.91838	4.13418	2.0476	0.03352
ENSSSCG00000007227		1282.23	313.802	4.08603	2.0307	1.0768e-06
ENSSSCG00000013072		15213.7	3724.16	4.08518	2.0304	1.3728e-06
Novel00560		48.9691	12.234	4.00277	2.001	0.00077746
Novel02495		636.576	159.603	3.98837	1.9958	3.103e-06
ENSSSCG00000004677	DUOXA1	30.926	7.81626	3.95671	1.9843	0.002434
Novel00781		24.7419	6.25844	3.95342	1.9831	0.0084946
ENSSSCG00000005172		16.9208	4.29102	3.94329	1.9794	0.035819
ENSSSCG00000010944		35960.8	9148.47	3.93074	1.9748	3.8642e-06
ENSSSCG00000005391		193.295	49.6475	3.89332	1.961	1.6985e-05
ENSSSCG00000021578		3187.77	821.071	3.88254	1.957	2.5593e-06
ENSSSCG00000011366	SLC25A20	2254.07	589.913	3.82113	1.934	5.6115e-06
Novel02205		27.0025	7.07176	3.81848	1.933	0.015464
ENSSSCG00000011557		769.136	203.617	3.77742	1.9174	1.249e-05
ENSSSCG00000003201	ATF5	32663.5	8736.4	3.73886	1.9026	3.7777e-06
ENSSSCG00000001091	KIAA0319	131.553	35.3025	3.72645	1.8978	0.00064532
ENSSSCG00000027527		283.377	76.4934	3.70455	1.8893	2.0485e-05
ENSSSCG00000013513		1626.55	441.668	3.68279	1.8808	9.2362e-06
ENSSSCG00000001723		716.964	197.183	3.63612	1.8624	1.7899e-05
ENSSSCG00000030187		35.8519	9.90547	3.61952	1.8558	0.004758
ENSSSCG00000016691		12.3018	3.41054	3.607	1.8508	0.036648
ENSSSCG00000012926		23119.9	6410.94	3.60625	1.8505	9.926e-06
Novel02022		33.0478	9.2227	3.58333	1.8413	0.011988
Novel00140		13.4217	3.75299	3.57638	1.8385	0.033777
ENSSSCG00000010556	PAX2	16.2759	4.55755	3.57118	1.8364	0.049321
ENSSSCG00000023264	IDH1	11095.4	3118.59	3.55784	1.831	0.00010353
ENSSSCG00000028299		61.9137	17.7042	3.4972	1.8062	0.00096773
ENSSSCG00000010860		2456.5	704.386	3.48752	1.8022	0.0052951
ENSSSCG00000025560		6462.5	1859.28	3.47569	1.7973	0.00011362
ENSSSCG00000023728	TBCEL	3174.57	921.852	3.4438	1.784	2.3766e-05
ENSSSCG00000005609		373.133	108.768	3.43046	1.7784	4.589e-05
ENSSSCG00000008569		11313.6	3301.13	3.42713	1.777	2.0519e-05
ENSSSCG00000003853		10330.8	3016.65	3.42452	1.7759	1.5977e-05
Novel00450		49.0012	14.3888	3.40558	1.7679	0.0017599
ENSSSCG00000016369		39.2392	11.6026	3.38182	1.7578	0.0035667
ENSSSCG00000002852	PLEKHF1	247.438	74.4831	3.32211	1.7321	8.0357e-05
ENSSSCG00000004642		1614.03	489.956	3.29414	1.7199	6.1465e-05
Novel01198		28.516	8.66338	3.29163	1.7188	0.011247
Novel00627		49.6195	15.0753	3.2914	1.7187	0.015574
Novel01971		67.6367	20.7039	3.26685	1.7079	0.0029781
ENSSSCG00000003086		47799.1	14811.4	3.22724	1.6903	5.7715e-05
Novel02198		19.0025	5.8985	3.22165	1.6878	0.018688
ENSSSCG00000017253	KCNJ16	59.2902	18.4187	3.21897	1.6866	0.0020186
Novel00431		587.473	182.881	3.21229	1.6836	0.0082428
ENSSSCG00000017861		1782.43	555.237	3.21028	1.6827	9.3272e-05
ENSSSCG00000014250		183.421	57.1355	3.21028	1.6827	0.00025608
ENSSSCG00000008214		35399.2	11045.1	3.20495	1.6803	0.010587
ENSSSCG00000005671	CRAT	7005.34	2186.52	3.20384	1.6798	6.8172e-05
Novel01417		71.0924	22.2105	3.20095	1.6785	0.0029676
ENSSSCG00000027472		1883.67	589.306	3.19652	1.6765	7.9456e-05
ENSSSCG00000004200	SMLR1	1259.2	395.674	3.18237	1.6701	7.3135e-05
ENSSSCG00000011685	PAQR9	430.343	135.26	3.1817	1.6698	8.4455e-05
Novel01014		36.0495	11.3398	3.17906	1.6686	0.0085933
ENSSSCG00000017608		339.801	107.931	3.14836	1.6546	0.014896
ENSSSCG00000026682		405.553	129.03	3.14313	1.6522	0.00015813
Novel02262		30.409	9.72905	3.12553	1.6441	0.023528
Novel00916		20.5653	6.58127	3.12488	1.6438	0.027241
ENSSSCG00000012925		6858.61	2203.61	3.11234	1.638	7.9433e-05
Novel00968		94.0845	30.4647	3.08827	1.6268	0.043156
Novel01022		140.28	45.6342	3.07396	1.6201	0.00048433
ENSSSCG00000006304	MPC2	4112.64	1343.08	3.06205	1.6145	0.00010622
Novel00256		35.9358	11.7599	3.05591	1.6116	0.008011
ENSSSCG00000015520		20.16	6.61295	3.0485	1.6081	0.038402
ENSSSCG00000003836		83.4203	27.4366	3.04048	1.6043	0.0042001
Novel01817		72.7844	24.0786	3.02283	1.5959	0.0019664
ENSSSCG00000002296	RDH11	9613.38	3201.6	3.00278	1.5863	0.00031884
ENSSSCG00000015525	TOR3A	270.267	90.1686	2.99738	1.5837	0.0043532
ENSSSCG00000028326	NR4A1	67.2189	22.4536	2.99364	1.5819	0.0026921
ENSSSCG00000003470	FAM131C	507.169	171.367	2.9596	1.5654	0.00019439
Novel01062		20.1581	6.8407	2.9467	1.5591	0.024431
ENSSSCG00000015688		122.082	41.4696	2.94384	1.5577	0.0098489
Novel02468		84.833	29.4411	2.88146	1.5268	0.017592
ENSSSCG00000027052	PEX11A	761.383	264.506	2.87847	1.5253	0.0051406
ENSSSCG00000011915	GRAMD1C	813.237	283.334	2.8703	1.5212	0.00026363
ENSSSCG00000015570		1774.75	619.84	2.86334	1.5177	0.0019053
ENSSSCG00000004746	ITPKA	188.922	66.3315	2.8481	1.51	0.0015429
ENSSSCG00000024015		16587.4	5830.64	2.84494	1.5084	0.0011495
Novel00980		25.5678	9.08341	2.81474	1.493	0.024721
ENSSSCG00000028282	SLC1A4	68.4103	24.3243	2.8124	1.4918	0.016481
ENSSSCG00000015617		4390.09	1561.79	2.81103	1.4911	0.02644
ENSSSCG00000021977	GPD1L	3378.94	1202.93	2.80889	1.49	0.00034688
ENSSSCG00000004181	VNN1	2300.41	822.609	2.79646	1.4836	0.00053754
ENSSSCG00000008555	CGREF1	95.0457	34.0588	2.79065	1.4806	0.013549
ENSSSCG00000024312	ID4	274.24	98.5308	2.78331	1.4768	0.00047064
ENSSSCG00000003191	TSKS	62.8508	22.5933	2.78176	1.476	0.0050767
ENSSSCG00000010456	PANK1	2007.84	723.818	2.77387	1.4719	0.00044082
Novel02026		540.737	195.45	2.76657	1.4681	0.00054043
ENSSSCG00000015114	NLRX1	1277.19	462.073	2.76408	1.4668	0.0005384
ENSSSCG00000017963		61.0977	22.3043	2.73929	1.4538	0.0056598
Novel01953		134.765	49.2088	2.73872	1.4535	0.0026523
ENSSSCG00000030065	ZBTB47	1458.74	533.164	2.73606	1.4521	0.00069823
ENSSSCG00000002620	EFHC1	46.4574	16.9843	2.7353	1.4517	0.012264
Novel01347		525.063	193.018	2.72036	1.4438	0.0075281
Novel01086		28.2736	10.4172	2.71415	1.4405	0.04097
ENSSSCG00000009237	HPSE	294.891	108.665	2.71377	1.4403	0.017447
ENSSSCG00000000105		1021.26	378.528	2.69802	1.4319	0.0036807
ENSSSCG00000004643		5975.42	2221.16	2.69017	1.4277	0.00075362
ENSSSCG00000025870	HEPACAM2	50.3164	18.7415	2.68477	1.4248	0.012172
ENSSSCG00000005429		1301.25	484.838	2.68384	1.4243	0.00068565
Novel01218		24.552	9.15554	2.68161	1.4231	0.040938
Novel00117		67.2148	25.1364	2.674	1.419	0.04863
Novel00963		47.4394	17.766	2.6703	1.417	0.018616
Novel00446		40.3494	15.1441	2.66438	1.4138	0.040805
Novel01557		194.708	73.3956	2.65277	1.4075	0.0037968
ENSSSCG00000029581		1012.27	382.3	2.64781	1.4048	0.00086488
Novel01903		177.064	67.2716	2.63207	1.3962	0.025081
ENSSSCG00000010450	LIPA	11205.9	4297.11	2.60774	1.3828	0.00092285
ENSSSCG00000004672		71089.7	27392.8	2.59512	1.3758	0.00089375
ENSSSCG00000010116		5039.25	1950.73	2.58327	1.3692	0.0012224
ENSSSCG00000015390		2012.02	780.403	2.57826	1.3664	0.00098519
ENSSSCG00000002662	C16orf74	30.5492	11.8516	2.57773	1.3661	0.038564
ENSSSCG00000014328	GFRA3	83.2294	32.4671	2.56347	1.3581	0.0075128
ENSSSCG00000016692	TAX1BP1	5293.76	2067.24	2.56081	1.3566	0.00099381
ENSSSCG00000012280		63.1554	24.7072	2.5562	1.354	0.0080973
Novel00458		72.1031	28.3547	2.54294	1.3465	0.014805
ENSSSCG00000003371	GPR153	236.605	93.2083	2.53837	1.3439	0.0032801
ENSSSCG00000022309	GPR34	222.449	87.8738	2.53151	1.34	0.0021455
ENSSSCG00000013864	TMEM38A	964.446	381.039	2.53116	1.3398	0.0019058
ENSSSCG00000024325	SGK2	738.288	293.587	2.51472	1.3304	0.032439
ENSSSCG00000012376	GDPD2	442.801	176.897	2.50325	1.3238	0.038212
Novel02315		73.8222	29.6017	2.49389	1.3184	0.0079617
Novel01474		572.115	230.324	2.48389	1.3126	0.035492
ENSSSCG00000006080	ERICH5	60.0744	24.1921	2.4832	1.3122	0.032141
ENSSSCG00000002621	TRAM2	273.895	110.333	2.48251	1.3118	0.002674
ENSSSCG00000000259	CSAD	1343.71	542.408	2.47735	1.3088	0.0015675
ENSSSCG00000008240	SH2D6	39.6281	16.1306	2.45666	1.2967	0.048509
ENSSSCG00000025217	PYCR1	95.232	38.7781	2.45581	1.2962	0.012584
Novel00768		511.111	208.986	2.44562	1.2902	0.0020006
Novel02512		36.2783	14.8672	2.4402	1.287	0.040089
ENSSSCG00000001478		37.9273	15.6063	2.43024	1.2811	0.030422
ENSSSCG00000004875		55881.5	23005.4	2.42906	1.2804	0.004875
ENSSSCG00000008605	TTC32	185.839	76.7375	2.42183	1.2761	0.0040857
ENSSSCG00000014063		1964.52	811.816	2.41999	1.275	0.0025287
ENSSSCG00000022427	RGS1	151.965	62.8238	2.41898	1.2744	0.0035151
Novel00385		30.8151	12.7692	2.41329	1.271	0.049874
ENSSSCG00000022976		95.677	39.7341	2.40794	1.2678	0.0063083
ENSSSCG00000028943		2511.53	1043.75	2.40627	1.2668	0.00252
ENSSSCG00000017914	GLTPD2	577.153	240.68	2.39795	1.2618	0.0032916
ENSSSCG00000002923	WDR62	266.732	111.416	2.39396	1.2594	0.0031886
ENSSSCG00000016204		257.988	108.123	2.38601	1.2546	0.015065
ENSSSCG00000008877	ETFDH	5616.66	2359.65	2.38023	1.2511	0.0028379
ENSSSCG00000023021		50.462	21.2191	2.37808	1.2498	0.025152
ENSSSCG00000001092		2537.11	1067.49	2.37677	1.249	0.0025429
Novel00903		204.098	85.9727	2.37397	1.2473	0.0045532
ENSSSCG00000000194		475.851	200.853	2.3692	1.2444	0.034421
ENSSSCG00000006105	GEM	30.0788	12.7638	2.35659	1.2367	0.039747
ENSSSCG00000007170	CPXM1	25.2122	10.71	2.35414	1.2352	0.049595
Novel02006		66.4074	28.3833	2.33966	1.2263	0.01573
ENSSSCG00000003467	SLC25A34	656.927	281.371	2.3348	1.2233	0.0050473
ENSSSCG00000026966	BFAR	60.9817	26.1519	2.33189	1.2215	0.021122
ENSSSCG00000004281		99.5241	42.7283	2.32931	1.2199	0.011513
ENSSSCG00000000659		306.561	131.701	2.32769	1.2189	0.011373
ENSSSCG00000011250		15674	6740.58	2.32527	1.2174	0.0045086
Novel01755		204.142	88.0632	2.31819	1.213	0.008776
ENSSSCG00000004420	TRAF3IP2	122.81	53.0021	2.31707	1.2123	0.035542
ENSSSCG00000004332		79.9519	34.6306	2.30873	1.2071	0.011542
ENSSSCG00000015955	ITGA6	424.122	184.73	2.29596	1.1991	0.032013
ENSSSCG00000028330		17509.6	7653.06	2.28786	1.194	0.0035998
ENSSSCG00000001093	ACOT13	5266.71	2304.87	2.28501	1.1922	0.0032116
ENSSSCG00000028010	ABHD3	875.012	383.621	2.28089	1.1896	0.0154
ENSSSCG00000017690		5218.05	2288.79	2.27979	1.1889	0.0035408
ENSSSCG00000001697	TMEM63B	1592.49	699.188	2.27758	1.1875	0.0045559
ENSSSCG00000023441	KLHDC8A	205.936	90.6566	2.27159	1.1837	0.030056
ENSSSCG00000016050	INPP1	97.4149	42.9265	2.26938	1.1823	0.024176
ENSSSCG00000014922		46.7321	20.6068	2.26781	1.1813	0.022149
ENSSSCG00000009490		60.3918	26.733	2.25902	1.1757	0.03193
Novel01170		181.784	80.5595	2.25652	1.1741	0.0057777
ENSSSCG00000006140	CA2	2344.55	1039.43	2.25558	1.1735	0.0072034
ENSSSCG00000004248		155.878	69.6971	2.23643	1.1612	0.010758
Novel00457		60.3302	27.0291	2.2321	1.1584	0.03322
ENSSSCG00000013373	SERGEF	189.799	85.0726	2.23101	1.1577	0.016789
ENSSSCG00000021292	OSBPL9	4369.12	1961.83	2.227	1.1551	0.0046836
ENSSSCG00000001986	NFATC4	80.2664	36.042	2.227	1.1551	0.020291
ENSSSCG00000013512	PLIN4	151.681	68.2197	2.22345	1.1528	0.015878
ENSSSCG00000004193	ENPP1	1574.63	709.702	2.21868	1.1497	0.0047485
Novel00600		402.511	181.551	2.21714	1.1487	0.0077078
ENSSSCG00000028896		2481.16	1121.44	2.21253	1.1457	0.0056052
ENSSSCG00000022364		54.2193	24.5473	2.2087	1.1432	0.046948
ENSSSCG00000011470	ABHD6	512.362	232.131	2.20717	1.1422	0.026701
ENSSSCG00000007879		421.603	191.502	2.20152	1.1385	0.0070579
ENSSSCG00000006808		73.3605	33.381	2.19771	1.136	0.030079
ENSSSCG00000010441		70.3833	32.2098	2.1851	1.1277	0.029403
Novel02188		133.883	61.2813	2.1848	1.1275	0.013373
ENSSSCG00000011625	CHST13	1583.79	724.943	2.18465	1.1274	0.0085979
ENSSSCG00000014156	ARRDC3	7512.1	3446.72	2.1795	1.124	0.0041323
ENSSSCG00000021355		20264.9	9318.64	2.17468	1.1208	0.0070034
ENSSSCG00000001657	CUL7	250.658	115.496	2.17031	1.1179	0.012404
ENSSSCG00000026624	TMEM135	256.611	118.279	2.16956	1.1174	0.010264
Novel00204		173.711	80.09	2.16895	1.117	0.01382
ENSSSCG00000011403		158.767	73.236	2.1679	1.1163	0.023204
ENSSSCG00000000906	TMCC3	177.137	81.8205	2.1649	1.1143	0.015362
ENSSSCG00000001822	RCCD1	151.648	70.0544	2.16475	1.1142	0.013997
ENSSSCG00000012911	CARNS1	6910.42	3199.76	2.15965	1.1108	0.0097862
ENSSSCG00000009512		202.721	93.8727	2.1595	1.1107	0.012614
ENSSSCG00000021939		691.825	320.639	2.15771	1.1095	0.0083588
Novel00441		77.0717	35.8067	2.15248	1.106	0.031422
ENSSSCG00000002734		434.631	202.177	2.1498	1.1042	0.010311
Novel02058		49.6104	23.0834	2.1492	1.1038	0.026744
Novel00041		335.796	156.322	2.14816	1.1031	0.013951
Novel01973		44.2239	20.6964	2.13672	1.0954	0.037258
Novel00912		323.747	151.555	2.13613	1.095	0.0099042
Novel02055		107.592	50.4225	2.13376	1.0934	0.031969
Novel01297		1225.1	579.454	2.11418	1.0801	0.0075462
ENSSSCG00000024134		246.116	116.532	2.11199	1.0786	0.015762
ENSSSCG00000016943	ADAMTS6	68.4544	32.4345	2.11052	1.0776	0.028985
ENSSSCG00000008230	ATOH8	93.9474	44.5411	2.10921	1.0767	0.02214
ENSSSCG00000004902		218.014	103.529	2.10585	1.0744	0.018313
ENSSSCG00000022099	TP53INP2	428.258	204.265	2.09652	1.068	0.014634
ENSSSCG00000009179		11293.4	5406.41	2.08884	1.0627	0.01136
ENSSSCG00000026607		156.316	74.8497	2.0884	1.0624	0.013492
ENSSSCG00000000214		5089.43	2438.13	2.08739	1.0617	0.011399
ENSSSCG00000030645		1336.15	640.472	2.08623	1.0609	0.01092
ENSSSCG00000028676		55.9767	26.8418	2.08537	1.0603	0.036097
Novel01397		62.3993	29.93	2.08479	1.0599	0.041403
ENSSSCG00000026583		306.886	147.429	2.08161	1.0577	0.016513
ENSSSCG00000021018		141.152	67.9661	2.07685	1.0544	0.025569
ENSSSCG00000029940	KCNAB3	143.363	69.174	2.07254	1.0514	0.023116
ENSSSCG00000006260		4069.88	1964.19	2.07211	1.0511	0.012445
Novel01038		113.031	54.5632	2.07153	1.0507	0.018001
ENSSSCG00000025067	ECE2	43.3396	20.9429	2.06938	1.0492	0.049536
ENSSSCG00000021402		153.722	74.3471	2.06766	1.048	0.024588
ENSSSCG00000022175	MYH15	91.922	44.5477	2.06351	1.0451	0.030965
ENSSSCG00000008467	EML4	972.716	471.466	2.06322	1.0449	0.0082539
Novel00506		74.1215	35.9595	2.06122	1.0435	0.04183
ENSSSCG00000006153		67.4775	32.742	2.06094	1.0433	0.029996
ENSSSCG00000014368		229.798	112.233	2.04755	1.0339	0.020196
ENSSSCG00000023247		2265.18	1107.95	2.04443	1.0317	0.014849
ENSSSCG00000013057		2842.31	1403.86	2.02469	1.0177	0.016668
ENSSSCG00000023141	RNLS	80.4101	39.8496	2.01782	1.0128	0.040684
ENSSSCG00000024109		4171.54	2067.72	2.0174	1.0125	0.016369
ENSSSCG00000012151	NHS	115.601	57.3758	2.01475	1.0106	0.030933
ENSSSCG00000000757		4717.5	2348.5	2.00875	1.0063	0.01714
ENSSSCG00000001696	MRPL14	2169.19	1082.15	2.00458	1.0033	0.015791
ENSSSCG00000021181	DHCR7	1197.54	2399.07	0.499169	-1.0024	0.012565
ENSSSCG00000026513		54.0603	108.571	0.497925	-1.006	0.033361
ENSSSCG00000003138	HSD17B14	1879.51	3786.14	0.496409	-1.0104	0.011395
ENSSSCG00000025134	FAM171B	46.636	94.128	0.495446	-1.0132	0.034373
ENSSSCG00000012832	MXRA5	113.884	230.754	0.493527	-1.0188	0.01578
ENSSSCG00000026425	ADAMTSL2	425.041	862.831	0.492604	-1.0215	0.013263
ENSSSCG00000002290	PLEK2	49.9343	101.597	0.491478	-1.0248	0.027562
ENSSSCG00000000419		1665.27	3430.39	0.485452	-1.0426	0.011032
ENSSSCG00000015135		134.996	278.719	0.484343	-1.0459	0.017219
ENSSSCG00000010204	BICC1	39.8752	82.4507	0.483638	-1.048	0.04117
ENSSSCG00000013551	C3	91814.8	189869	0.483571	-1.0482	0.0089084
Novel01404		27.9836	58.0451	0.482099	-1.0526	0.031823
ENSSSCG00000017473		39.417	81.7708	0.482032	-1.0528	0.02753
ENSSSCG00000021943		35.8289	74.8046	0.478968	-1.062	0.037575
ENSSSCG00000010039		35.1758	73.5109	0.478503	-1.0634	0.024167
ENSSSCG00000028278	POLR2A	419.553	882.143	0.475593	-1.0722	0.04582
Novel01192		234.952	494.392	0.475231	-1.0733	0.0072051
ENSSSCG00000006560	CREB3L4	65.9181	139.243	0.47339	-1.0789	0.037643
ENSSSCG00000015364		75.6197	159.814	0.47316	-1.0796	0.020714
ENSSSCG00000001382		75.092	158.857	0.472701	-1.081	0.015361
ENSSSCG00000006655	CIART	64.3164	137.405	0.468071	-1.0952	0.011564
ENSSSCG00000025054	EVA1A	184.373	394.309	0.467585	-1.0967	0.0086983
ENSSSCG00000015268		26492.1	57041.5	0.464452	-1.1064	0.0059778
ENSSSCG00000027208		28.4472	61.5216	0.462396	-1.1128	0.034811
ENSSSCG00000000654	CLECL1	83.2912	180.539	0.461339	-1.1161	0.01219
ENSSSCG00000011386		1706.08	3699.19	0.461211	-1.1165	0.0055464
ENSSSCG00000022891	TMEM8C	21.2564	46.1322	0.460764	-1.1179	0.044962
ENSSSCG00000028872		119.954	261.293	0.459074	-1.1232	0.019571
ENSSSCG00000012108		140.291	306.761	0.457328	-1.1287	0.008975
ENSSSCG00000005650	CERCAM	34.5888	75.8569	0.455967	-1.133	0.019755
ENSSSCG00000017579		32.8382	72.0522	0.455745	-1.1337	0.021911
ENSSSCG00000006780	WNT2B	75.9744	167.144	0.454547	-1.1375	0.0087771
ENSSSCG00000002483		88101	194561	0.452817	-1.143	0.0035135
ENSSSCG00000026302	MKI67	33.4237	73.8557	0.452566	-1.1438	0.021179
Novel00155		38.3674	84.7977	0.452472	-1.1441	0.01377
ENSSSCG00000000046		30827	68207.4	0.45197	-1.1457	0.015042
ENSSSCG00000002484		34453.9	76481.2	0.4505	-1.1504	0.0032074
ENSSSCG00000013517	UHRF1	15.8456	35.3375	0.448413	-1.1571	0.032758
Novel01967		24.858	56.1815	0.442454	-1.1764	0.02195
ENSSSCG00000022228		27.3943	62.045	0.441535	-1.1794	0.020088
ENSSSCG00000014818	STARD10	1769.11	4007.85	0.441413	-1.1798	0.0037649
ENSSSCG00000008984	SHROOM3	136.478	309.578	0.440862	-1.1816	0.042965
ENSSSCG00000026427	RORC	751.351	1707.11	0.44013	-1.184	0.0029947
ENSSSCG00000021015		29.2766	66.7468	0.438607	-1.189	0.017199
ENSSSCG00000007457	SULF2	16.1743	37.0684	0.436333	-1.1965	0.034722
ENSSSCG00000006985	MTMR7	226.803	520.566	0.435698	-1.1986	0.01746
ENSSSCG00000025046		28.3619	65.2103	0.434944	-1.2011	0.018755
ENSSSCG00000006831		14.04	32.3678	0.433769	-1.205	0.046152
ENSSSCG00000011125	GATA3	19.9224	46.0972	0.432179	-1.2103	0.03304
ENSSSCG00000010079	PPM1F	178.352	412.704	0.432149	-1.2104	0.004442
Novel00396		18.8609	43.9004	0.42964	-1.2188	0.024631
ENSSSCG00000011143		13.6443	31.7981	0.429104	-1.2206	0.037868
ENSSSCG00000014982		98.7105	232.24	0.425049	-1.2343	0.0035464
ENSSSCG00000003968	RIMKLA	81.2916	191.959	0.42349	-1.2396	0.0084638
ENSSSCG00000000010		1148.44	2712.56	0.423373	-1.24	0.0032715
ENSSSCG00000025173		39.2752	93.0122	0.422259	-1.2438	0.0086723
ENSSSCG00000025867	COBL	24.9365	59.1642	0.421469	-1.2465	0.01525
ENSSSCG00000012895		11.8146	28.1248	0.42007	-1.2513	0.045816
ENSSSCG00000024166	SLC2A6	16.66	39.699	0.419662	-1.2527	0.030332
ENSSSCG00000026448		11.2122	26.9832	0.415523	-1.267	0.045092
ENSSSCG00000010955		131.551	316.915	0.415091	-1.2685	0.0071774
ENSSSCG00000001234	TRIM10	30.1693	72.7051	0.414947	-1.269	0.046665
ENSSSCG00000007007	IDO1	10.5457	25.4391	0.414545	-1.2704	0.040941
ENSSSCG00000009633		89.6249	217.254	0.412538	-1.2774	0.0043755
ENSSSCG00000002902		9.19166	22.3268	0.411681	-1.2804	0.048176
ENSSSCG00000000736		120.748	294.204	0.410428	-1.2848	0.041229
ENSSSCG00000021006		118.661	289.245	0.410257	-1.2854	0.032783
ENSSSCG00000017759		12.1755	29.7465	0.40932	-1.2887	0.04985
ENSSSCG00000029074		80.2374	196.257	0.408838	-1.2904	0.0075575
ENSSSCG00000006735		213.197	524.353	0.406577	-1.2984	0.0014029
ENSSSCG00000017581		37.5666	92.5701	0.405817	-1.3011	0.0068928
ENSSSCG00000005979	ANXA13	52.6009	130.114	0.404273	-1.3066	0.0055642
ENSSSCG00000013440	ATP8B3	31.2045	77.4123	0.403097	-1.3108	0.028374
ENSSSCG00000003825		247.896	616.061	0.402399	-1.3133	0.0015724
ENSSSCG00000011899		8.48999	21.342	0.397796	-1.3299	0.047076
ENSSSCG00000001518		163.794	412.765	0.396832	-1.3334	0.0030911
ENSSSCG00000025932	AP1S3	9.65327	24.3468	0.396502	-1.3346	0.048787
ENSSSCG00000005981		26.203	66.3152	0.39513	-1.3396	0.01095
Novel02319		758.001	1924.15	0.393954	-1.3439	0.0093732
ENSSSCG00000010325		119.045	306.243	0.388719	-1.3632	0.002017
ENSSSCG00000006238	CYP7A1	1842.22	4742.42	0.38845	-1.3642	0.031502
ENSSSCG00000001746		30.1463	77.6378	0.388288	-1.3648	0.036602
ENSSSCG00000013060		403.32	1044.87	0.386007	-1.3733	0.00077996
ENSSSCG00000017793		9.12127	23.7262	0.384432	-1.3792	0.03035
ENSSSCG00000008875	RXFP1	8.68666	22.6054	0.384272	-1.3798	0.026714
Novel01627		9.2273	24.0419	0.383793	-1.3816	0.041345
ENSSSCG00000011847	ZDHHC19	9.96747	26.0022	0.383341	-1.3833	0.041924
Novel02300		15.2577	40.0443	0.38101	-1.3921	0.03108
ENSSSCG00000003014	TMEM91	31.0319	81.5378	0.380587	-1.3937	0.033006
Novel01543		10.7414	28.6182	0.375348	-1.4137	0.029948
Novel00785		303.449	808.848	0.375166	-1.4144	0.014984
ENSSSCG00000003318		77.5905	207.254	0.374386	-1.4174	0.00095343
ENSSSCG00000006288		88.8481	238.471	0.372574	-1.4244	0.0011458
ENSSSCG00000026326	CCNF	9.4369	25.6139	0.36844	-1.4405	0.02439
Novel00156		31.3077	85.9422	0.3643	-1.4568	0.0019578
ENSSSCG00000024161		131.931	363.302	0.363141	-1.4614	0.047442
ENSSSCG00000024476		3519.75	9751.76	0.360932	-1.4702	0.012706
Novel01272		37.0286	103.465	0.357893	-1.4824	0.0081936
ENSSSCG00000007365	L3MBTL1	6.77734	18.9988	0.356729	-1.4871	0.041293
ENSSSCG00000021657		12.9605	36.354	0.356506	-1.488	0.012825
ENSSSCG00000025593		19.6574	55.2999	0.35547	-1.4922	0.005628
Novel01160		43.8157	123.288	0.355396	-1.4925	0.0013948
ENSSSCG00000025858		20.7885	58.8059	0.353504	-1.5002	0.0049611
Novel01894		19.4255	54.9499	0.353504	-1.5002	0.016432
ENSSSCG00000023379		178.008	511.48	0.348034	-1.5227	0.022428
ENSSSCG00000030626		5284.59	15230.3	0.346974	-1.5271	0.00020923
ENSSSCG00000020746	TRIM7	6.5788	19.0981	0.344482	-1.5375	0.041375
ENSSSCG00000002981		59.0845	172.514	0.342482	-1.5459	0.00070655
ENSSSCG00000012769	ATP2B3	16.5679	48.6715	0.340399	-1.5547	0.0036005
ENSSSCG00000017933		26.9205	79.9668	0.336645	-1.5707	0.0052866
ENSSSCG00000028347		21.8177	65.7442	0.331849	-1.5914	0.015278
ENSSSCG00000012049		12.401	37.5935	0.329877	-1.6	0.015152
ENSSSCG00000010529		32.122	97.4702	0.329557	-1.6014	0.0033853
ENSSSCG00000009585		160.13	487.204	0.328667	-1.6053	0.0009253
ENSSSCG00000016244	COL4A4	9.04756	27.583	0.328007	-1.6082	0.012785
Novel00895		21.969	67.8368	0.323851	-1.6266	0.011792
ENSSSCG00000016686	PRR15	21.1538	65.9782	0.320612	-1.6411	0.0016228
ENSSSCG00000012805	SPRY3	7.31078	23.0134	0.31767	-1.6544	0.015093
ENSSSCG00000027496		16.6951	52.7114	0.316724	-1.6587	0.0020252
ENSSSCG00000024658		4.47968	14.4838	0.309283	-1.693	0.03662
ENSSSCG00000002368	LTBP2	15.0428	48.9222	0.307488	-1.7014	0.0099218
ENSSSCG00000023530		4.31633	14.1506	0.305025	-1.713	0.042135
Novel00466		8.43455	27.8545	0.302813	-1.7235	0.026357
ENSSSCG00000006060	GRHL2	4.90278	16.3858	0.299204	-1.7408	0.034418
ENSSSCG00000001793	ADAMTSL3	8.27363	27.8841	0.296725	-1.7528	0.028315
Novel00398		5.75041	19.7471	0.291204	-1.7799	0.019967
Novel01493		49.2364	171.025	0.287892	-1.7964	0.00036574
Novel02414		3.87585	13.57	0.285626	-1.8078	0.04343
ENSSSCG00000008813	CORIN	89.8055	315.25	0.284875	-1.8116	3.9121e-05
ENSSSCG00000008311	CYP26B1	13.7711	48.7344	0.282574	-1.8233	0.0010878
ENSSSCG00000001816		3.8566	13.6563	0.282398	-1.8242	0.038266
ENSSSCG00000017694		431.328	1535.1	0.280972	-1.8315	1.4396e-05
ENSSSCG00000011800	FETUB	1480.8	5284.88	0.280194	-1.8355	6.1849e-06
Novel02529		37.681	136.803	0.275438	-1.8602	0.0047983
ENSSSCG00000017063	SGCD	3.21713	11.8003	0.272627	-1.875	0.039902
Novel02038		3.8214	14.0359	0.272249	-1.877	0.0377
ENSSSCG00000002993		5822.81	22051.8	0.264053	-1.9211	0.024278
ENSSSCG00000022808		3597.32	13747.4	0.261666	-1.9342	0.028205
Novel01784		5.06613	19.451	0.260454	-1.9409	0.0085257
ENSSSCG00000013932	LPAR2	15.0852	58.011	0.260039	-1.9432	0.023777
Novel01392		144.416	555.64	0.259913	-1.9439	0.019953
Novel00709		8.11847	31.5645	0.257207	-1.959	0.039078
ENSSSCG00000013989	GJC2	4.79531	18.6531	0.257082	-1.9597	0.010669
Novel00715		7.03853	27.4846	0.256086	-1.9653	0.03203
ENSSSCG00000005831	LCN12	5.9379	23.3199	0.254635	-1.9735	0.023637
ENSSSCG00000013341	LUZP2	27.9385	109.795	0.254458	-1.9745	0.021582
ENSSSCG00000030575	TMEM158	2.97376	11.6889	0.254405	-1.9748	0.040708
Novel01465		14.6751	57.7464	0.254123	-1.9764	0.005021
ENSSSCG00000014326	KIF20A	4.83051	19.1294	0.252525	-1.9855	0.0082275
ENSSSCG00000014214	TRIM36	4.00069	16.1055	0.248411	-2.0092	0.016098
Novel01035		3.09229	12.6191	0.245042	-2.0289	0.025522
ENSSSCG00000030990		4.02957	16.5076	0.244109	-2.0344	0.01391
Novel00210		637.392	2652.47	0.240299	-2.0571	0.0015398
ENSSSCG00000005195		65.4551	272.815	0.239932	-2.0593	0.016397
Novel00211		481.979	2014.17	0.239301	-2.0631	1.0054e-06
ENSSSCG00000013004	TM7SF2	2072.87	8695.67	0.238374	-2.0687	0.0055362
ENSSSCG00000015657		33.3326	142.761	0.233485	-2.0986	1.3493e-05
Novel02131		2.93037	12.6754	0.231182	-2.1129	0.020844
ENSSSCG00000023235	MAN1C1	295.227	1286.06	0.229553	-2.1231	3.9975e-07
ENSSSCG00000012536		361.816	1602.74	0.22575	-2.1472	0.049015
ENSSSCG00000022347		14.7941	65.7829	0.224891	-2.1527	0.0079521
ENSSSCG00000010037		2.49621	11.3611	0.219714	-2.1863	0.021655
ENSSSCG00000026149		477.51	2187.97	0.218242	-2.196	0.0090977
ENSSSCG00000005194		77.3053	354.744	0.217924	-2.1981	0.025316
ENSSSCG00000017695		4.88496	22.4486	0.217607	-2.2002	0.002729
ENSSSCG00000023167		69.4626	332.725	0.208772	-2.26	0.0030902
ENSSSCG00000004452	PRSS35	38.5964	185.06	0.208555	-2.2615	0.030444
ENSSSCG00000011801		19490.6	94603.4	0.206026	-2.2791	1.0097e-05
ENSSSCG00000000289		3.2894	16.1318	0.203909	-2.294	0.0086419
ENSSSCG00000006842		1.78492	9.00371	0.198237	-2.3347	0.035839
ENSSSCG00000016728		599.944	3085.17	0.194454	-2.3625	0.0016702
ENSSSCG00000015651		17.3284	90.2131	0.192083	-2.3802	8.632e-06
ENSSSCG00000007548		2.96414	15.9608	0.18572	-2.4288	0.0061292
ENSSSCG00000012558	PIH1D3	4.72304	25.7007	0.183773	-2.444	0.0095408
ENSSSCG00000013246		2.56029	14.1014	0.181558	-2.4615	0.037047
ENSSSCG00000010334		82.0612	456.315	0.179829	-2.4753	0.019289
ENSSSCG00000005953	KCNQ3	1.66639	9.63894	0.172887	-2.5321	0.025109
ENSSSCG00000030830		2.71114	15.7668	0.171955	-2.5399	0.0073384
Novel01287		14.4823	84.8942	0.170589	-2.5514	0.011403
ENSSSCG00000025510		11.9268	71.779	0.166155	-2.5894	2.3512e-06
ENSSSCG00000015604	NEK2	1.19847	7.2269	0.165833	-2.5922	0.041573
ENSSSCG00000015726	CNTNAP5	3.63204	22.7031	0.159984	-2.644	0.025804
ENSSSCG00000000748	IQSEC3	18.0295	112.81	0.159818	-2.6455	0.00022513
ENSSSCG00000014055	CDHR2	1.66639	10.5036	0.158648	-2.6561	0.019749
ENSSSCG00000003690	DLGAP1	2.13575	13.6901	0.156009	-2.6803	0.0042611
ENSSSCG00000011133	PFKFB3	40.3517	260.947	0.154631	-2.6931	0.00034922
Novel00901		4.24593	30.4179	0.139583	-2.8408	8.6327e-05
Novel01447		1.25292	9.02499	0.138831	-2.8486	0.014191
ENSSSCG00000004422	WISP3	0.83801	6.16124	0.136011	-2.8782	0.049779
ENSSSCG00000012492	DRP2	1.03656	8.11283	0.127768	-2.9684	0.029645
ENSSSCG00000013378	ABCC8	2.86486	22.7293	0.126044	-2.988	0.0014588
Novel01582		2.84704	22.7398	0.125199	-2.9977	0.023904
Novel00535		19.535	159.153	0.122742	-3.0263	2.421e-07
ENSSSCG00000026431	ALPL	273.461	2248.69	0.121607	-3.0397	0.046336
ENSSSCG00000001397		10.7592	88.5204	0.121548	-3.0404	0.028976
ENSSSCG00000023467		3.97512	32.7528	0.121371	-3.0425	0.008242
ENSSSCG00000012774		8.81526	74.4	0.118487	-3.0772	0.028464
ENSSSCG00000009635		0.89246	8.6984	0.1026	-3.2849	0.011678
Novel00469		0.720919	7.04338	0.102351	-3.2884	0.015664
ENSSSCG00000003234		0.83801	8.65795	0.0967899	-3.369	0.011856
ENSSSCG00000010632	TECTB	20.8703	218.702	0.0954309	-3.3894	0.025438
Novel01581		2.12613	22.6317	0.0939476	-3.412	0.00019536
ENSSSCG00000029944		608.502	6554.51	0.0928342	-3.4292	0.013335
ENSSSCG00000027365	WNT7B	0.621646	7.1193	0.0873166	-3.5176	0.015735
ENSSSCG00000023044		698.803	8123.2	0.086025	-3.5391	0.02067
Novel00167		0.522374	7.07342	0.0738479	-3.7593	0.019464
Novel02508		3.53277	47.9657	0.0736536	-3.7631	0.0028113
ENSSSCG00000021505		0.360459	5.34083	0.0674892	-3.8892	0.037272
ENSSSCG00000009605	GFRA2	0.315636	4.99507	0.0631882	-3.9842	0.035374
ENSSSCG00000030777		0.315636	5.04095	0.0626127	-3.9974	0.028767
ENSSSCG00000001227		113.118	1853.13	0.0610401	-4.0341	0.027677
ENSSSCG00000011747		0.315636	6.33436	0.049828	-4.3269	0.013597
