# Supplementary material for: Transcriptomic analysis of Bama pig's liver in various nutritional states reveals a metabolic difference of fatty acids
Source: Royal Society of Chemistry journal article supplement (doi:10.1039/c7fo00937b), 2017-01-01
Supplement: c7fo00937b3.xlsx [file c7fo00937b3.xlsx]

## Sheet: DEGs
Table S3 Differentially expressed genes of H/C group
Gene id	HGNC symbol	readcount HFD	readcount control	FoldChange	log2FoldChange	p-val
ENSSSCG00000000015	UPK3A	121.483	0.702616	172.901	7.4338	0.00063162
ENSSSCG00000025801		284.547	1.98612	143.271	7.1626	0.00069573
ENSSSCG00000014861		191.771	1.34929	142.123	7.151	0.0027748
ENSSSCG00000024996		33.4078	0.346382	96.4494	6.5917	6.7264e-10
ENSSSCG00000010344	NRG3	29.9464	0.346382	86.4563	6.4339	3.7547e-09
ENSSSCG00000028631		27.0468	0.346382	78.081	6.2869	1.4965e-08
ENSSSCG00000029210		24.2795	0.346382	70.0931	6.1312	6.2761e-08
Novel00145		54.8011	0.927269	59.1006	5.8851	0.017206
Novel00025		17.0804	0.346382	49.3097	5.6238	0.043873
Novel00867		13.9902	0.290444	48.1679	5.59	3.3166e-05
ENSSSCG00000004673	SLC28A2	16.2796	0.346382	47.0004	5.5546	0.0056644
Novel01717		13.2209	0.290444	45.5191	5.5084	6.2224e-05
ENSSSCG00000023922		44.4488	1.049	42.3738	5.4051	1.9539e-10
ENSSSCG00000023733		55.841	1.42494	39.1896	5.2924	8.7466e-07
ENSSSCG00000030425		24.8659	0.636825	39.0459	5.2871	0.0078725
ENSSSCG00000013378	ABCC8	816.266	21.0543	38.7708	5.2769	0.0018761
Novel01315		13.7013	0.356234	38.4604	5.2653	4.719e-05
ENSSSCG00000027266	PNPLA3	720.93	19.9423	36.1519	5.176	3.1814e-05
Novel02201		79.6891	2.78408	28.6229	4.8391	3.498e-07
ENSSSCG00000023607	CYP4F22	8.2617	0.290444	28.4449	4.8301	0.033505
ENSSSCG00000024537		15.9189	0.580887	27.4037	4.7763	0.028979
Novel01801		99.2854	3.936	25.2253	4.6568	6.4947e-12
Novel00044		347.619	13.9181	24.9765	4.6425	0.00010813
ENSSSCG00000022526		8.86611	0.356234	24.8884	4.6374	0.0014065
Novel01847		51.4121	2.07161	24.8177	4.6333	0.00012029
Novel01366		6.98879	0.290444	24.0623	4.5887	0.0064776
ENSSSCG00000003900	DMBX1	45.9492	2.0989	21.8915	4.4523	1.3127e-07
Novel01152		22.928	1.05885	21.6531	4.4365	0.0015192
ENSSSCG00000017637	MPO	19.6707	0.937121	20.991	4.3917	1.298e-05
ENSSSCG00000013909	CRLF1	5.97475	0.290444	20.5704	4.3625	0.014355
Novel00894		75.558	3.71135	20.3591	4.3476	0.0061121
ENSSSCG00000006243	PENK	13.107	0.646678	20.2676	4.3411	0.00022439
ENSSSCG00000027643		370.161	19.974	18.5327	4.212	0.041809
ENSSSCG00000006836	KIAA1324	6.23116	0.356234	17.4917	4.1286	0.011039
ENSSSCG00000001441		169.485	9.88043	17.1531	4.1004	1.1303e-08
ENSSSCG00000028664		30.2872	1.77132	17.0985	4.0958	1.9529e-05
ENSSSCG00000002375	RPS6KL1	308.31	18.1159	17.0181	4.089	0.0029579
ENSSSCG00000026850		272.421	16.3539	16.6575	4.0581	0.011325
Novel01307		16.4041	1.00291	16.3566	4.0318	0.0043321
Novel01197		10.5598	0.646678	16.3294	4.0294	0.040044
Novel01736		33.9187	2.07829	16.3203	4.0286	2.7723e-06
ENSSSCG00000023915		45.9972	3.14789	14.6122	3.8691	0.00052911
ENSSSCG00000021968	SLC19A3	197.916	13.8833	14.256	3.8335	0.0018399
ENSSSCG00000023969	ACER1	4.84775	0.346382	13.9956	3.8069	0.032663
ENSSSCG00000029500		7.98196	0.580887	13.7409	3.7804	0.026746
ENSSSCG00000020745		218.319	18.2693	11.9497	3.5789	0.0032887
ENSSSCG00000029249		8.36636	0.702616	11.9075	3.5738	0.042027
ENSSSCG00000010554		130154	11010.3	11.8212	3.5633	0.0063055
Novel02054		7.78276	0.712468	10.9238	3.4494	0.0096039
ENSSSCG00000024124		16.4473	1.51801	10.8348	3.4376	0.0057231
ENSSSCG00000022033		75.8834	7.01811	10.8123	3.4346	0.026803
ENSSSCG00000016247	TM4SF20	477.831	44.4321	10.754	3.4268	0.00046097
ENSSSCG00000025890	RAB9B	7.63298	0.712468	10.7131	3.4213	0.0098962
ENSSSCG00000009937		260.765	24.7714	10.5268	3.396	0.038637
Novel01725		164.069	15.9799	10.2674	3.36	0.0028197
ENSSSCG00000016153	UNC80	6.61943	0.646678	10.2361	3.3556	0.020425
Novel01376		23.0269	2.34235	9.83074	3.2973	6.6503e-05
ENSSSCG00000017926		581.699	59.5197	9.77299	3.2888	0.014518
ENSSSCG00000013275	SYT13	87.6824	9.05349	9.68465	3.2757	4.2289e-08
Novel00170		59.7593	6.41661	9.31335	3.2193	0.0059005
ENSSSCG00000003527		14.2849	1.57395	9.07564	3.182	0.0015487
ENSSSCG00000002512	DEGS2	77.74	8.73121	8.90367	3.1544	0.030249
ENSSSCG00000000978	MLC1	250.242	29.3094	8.53801	3.0939	7.9737e-05
Novel00207		11.838	1.39538	8.48374	3.0847	0.027286
ENSSSCG00000014196	TMEM232	11.8181	1.41508	8.3513	3.062	0.0027668
Novel01733		7.52249	0.927269	8.11224	3.0201	0.03087
ENSSSCG00000001228		97.3449	12.1999	7.97896	2.9962	0.037794
ENSSSCG00000025541	ELOVL6	1121.8	140.642	7.97619	2.9957	0.035671
Novel00177		18.5709	2.418	7.6805	2.9412	0.047505
ENSSSCG00000014368		796.466	103.968	7.66083	2.9375	2.4057e-09
ENSSSCG00000002883	DMKN	51.7257	6.81984	7.58474	2.9231	0.00072914
ENSSSCG00000001699		39.621	5.305	7.4684	2.9008	0.045739
Novel02038		95.9012	13.0051	7.37427	2.8825	0.0013449
Novel00001		18.5646	2.52092	7.36405	2.8805	0.010585
Novel01740		203.019	27.6201	7.35028	2.8778	4.2053e-05
Novel00353		70.4763	9.62225	7.32435	2.8727	0.029368
ENSSSCG00000015747		37.275	5.25664	7.09105	2.826	0.039985
ENSSSCG00000018056	SRCIN1	126.103	17.8782	7.05331	2.8183	0.00024176
Novel01593		55.8211	8.03982	6.9432	2.7956	5.2207e-06
Novel02468		187.843	27.2758	6.88664	2.7838	1.0925e-07
ENSSSCG00000026701	PHOSPHO1	8.66593	1.2835	6.75193	2.7553	0.019675
ENSSSCG00000021159		99.3389	14.7689	6.72624	2.7498	0.013341
ENSSSCG00000015830	UNC5D	263.613	39.97	6.59512	2.7214	0.0054733
ENSSSCG00000011685	PAQR9	820.518	125.409	6.54276	2.7099	6.1033e-05
Novel01764		62.4535	9.63575	6.48138	2.6963	3.3179e-05
Novel01904		51.3227	7.95523	6.45135	2.6896	9.8606e-05
Novel01365		39.0247	6.32444	6.17055	2.6254	0.00219
ENSSSCG00000029944		37469.6	6078.21	6.16457	2.624	0.0087644
ENSSSCG00000027241		15.9247	2.62294	6.07128	2.602	0.005231
ENSSSCG00000029794		7.59565	1.29336	5.87301	2.5541	0.035993
Novel01826		1617.47	277.246	5.83406	2.5445	0.027388
ENSSSCG00000010549		3791.46	652.297	5.81267	2.5392	0.009021
ENSSSCG00000024379	PCSK4	69.9811	12.0501	5.80743	2.5379	0.045949
ENSSSCG00000001498	BEND6	21.7575	3.74758	5.80582	2.5375	0.0017682
ENSSSCG00000016830		77.4966	13.3985	5.78413	2.5321	8.7031e-06
ENSSSCG00000028896		5980.45	1039.57	5.75294	2.5243	5.8779e-08
ENSSSCG00000005352	FRMPD1	115.619	20.2072	5.72153	2.5164	0.0075399
ENSSSCG00000000874	GAS2L3	72.9707	12.8646	5.67217	2.5039	1.5822e-05
ENSSSCG00000004885	CDH19	20.5892	3.69165	5.57743	2.4796	0.0014562
ENSSSCG00000026791		13.4589	2.418	5.56623	2.4767	0.0061446
ENSSSCG00000030580		9.32951	1.68582	5.53391	2.4683	0.022239
ENSSSCG00000017933		405.34	73.9216	5.48351	2.4551	0.0006747
Novel01741		193.949	35.4013	5.47857	2.4538	0.042004
ENSSSCG00000017925		30.1553	5.56589	5.41777	2.4377	0.0063737
ENSSSCG00000016156		3652.12	675.383	5.40764	2.435	8.4458e-05
ENSSSCG00000005377		16.0231	2.97918	5.37849	2.4272	0.0049898
ENSSSCG00000001091	KIAA0319	174.821	32.7205	5.34281	2.4176	1.9858e-06
ENSSSCG00000002472	IFI27L2	276.497	52.0406	5.31327	2.4096	0.00032862
ENSSSCG00000016184		29.7288	5.60212	5.30664	2.4078	0.017903
Novel00208		29.1839	5.5189	5.28792	2.4027	0.00048887
Novel01187		31.3856	5.95168	5.27328	2.3987	0.00052033
ENSSSCG00000003227	IGLON5	12.3144	2.34235	5.25722	2.3943	0.029006
Novel00827		42.6656	8.21521	5.19347	2.3767	0.026864
Novel01215		34.1577	6.62474	5.15617	2.3663	0.0024781
ENSSSCG00000027796		17912.2	3495.09	5.12482	2.3575	0.0029793
ENSSSCG00000016606	ASB15	7.18946	1.40523	5.1163	2.3551	0.043654
ENSSSCG00000012138		391.576	77.1992	5.07216	2.3426	9.7281e-05
ENSSSCG00000015287	TMCC2	25.6987	5.08035	5.05847	2.3387	0.0010561
ENSSSCG00000003594		184.337	36.7885	5.01066	2.325	0.041885
ENSSSCG00000028977	DOK6	10.8031	2.16469	4.99055	2.3192	0.02335
ENSSSCG00000012590	LHFPL1	8.68385	1.75161	4.9578	2.3097	0.031882
ENSSSCG00000023044		36671.5	7529.79	4.87026	2.284	0.021585
Novel00391		8.00234	1.64959	4.85106	2.2783	0.046756
ENSSSCG00000029449	PRG4	1374.02	285.617	4.81054	2.2662	0.00017055
ENSSSCG00000030146		8.204	1.70553	4.81021	2.2661	0.03922
Novel01209		32.7632	6.85029	4.78262	2.2578	0.024713
Novel00866		333.234	69.7413	4.77798	2.2564	0.00042675
ENSSSCG00000008773		3043.25	640.134	4.75419	2.2492	0.010114
ENSSSCG00000001045	ELOVL2	26.422	5.56589	4.74728	2.2471	0.0016654
ENSSSCG00000009132		417.092	88.8925	4.69199	2.2302	0.0011238
ENSSSCG00000006106	CDH17	96.3717	20.6809	4.6599	2.2203	0.042491
Novel01903		288.379	62.2647	4.63157	2.2115	9.142e-06
ENSSSCG00000008717		45.9516	10.0062	4.59225	2.1992	0.00033496
ENSSSCG00000012504	NAP1L3	91.6014	20.2667	4.51993	2.1763	0.02027
Novel00094		15.9262	3.52383	4.51962	2.1762	0.0097103
Novel00856		14.4695	3.20383	4.51617	2.1751	0.019557
ENSSSCG00000011962		52.7053	11.7695	4.47814	2.1629	0.00033563
Novel00378		42.2554	9.45263	4.47008	2.1603	0.00061404
Novel00798		16.757	3.80352	4.40579	2.1394	0.0071685
ENSSSCG00000009144	ETNPPL	8613.5	1967.39	4.37809	2.1303	0.0001847
ENSSSCG00000011973	COL8A1	128.981	29.6881	4.34453	2.1192	0.012283
ENSSSCG00000015333	ASB4	71.5534	16.5684	4.31871	2.1106	0.00015333
ENSSSCG00000020977		15.5248	3.616	4.29334	2.1021	0.012426
ENSSSCG00000008745	PROM1	46.4328	10.8601	4.27552	2.0961	0.0094188
Novel02266		11.5268	2.69859	4.27137	2.0947	0.032711
Novel00584		102.855	24.734	4.15832	2.056	0.042985
ENSSSCG00000020727		13.8263	3.32556	4.15745	2.0557	0.017689
ENSSSCG00000004452	PRSS35	705.268	171.546	4.11132	2.0396	0.0015342
Novel00980		34.5939	8.43546	4.10107	2.036	0.04675
Novel00698		84.0288	20.5438	4.09028	2.0322	0.00049309
ENSSSCG00000003260	VSTM1	16.486	4.03803	4.08263	2.0295	0.012912
ENSSSCG00000023609	TP53INP1	7530.66	1857.44	4.05443	2.0195	1.4922e-05
ENSSSCG00000004402	METTL24	310.236	77.1484	4.02141	2.0077	0.00017745
Novel02512		55.1023	13.7852	3.99723	1.999	0.0078112
Novel01392		2038.75	515.067	3.95835	1.9849	0.0029442
ENSSSCG00000026149		7977.1	2027.82	3.93374	1.9759	0.0022697
ENSSSCG00000012347	ALAS2	1514.79	385.398	3.93046	1.9747	0.00016451
ENSSSCG00000027947		25.881	6.59518	3.9242	1.9724	0.0044241
Novel00826		40.5502	10.4117	3.89467	1.9615	0.017149
ENSSSCG00000030029	DPPA2	17.8234	4.59026	3.88281	1.9571	0.042995
ENSSSCG00000012548	MUM1L1	473.233	122.188	3.87286	1.9534	2.9273e-05
Novel01512		43.5061	11.2535	3.86589	1.9508	0.0012842
Novel01212		17.4768	4.58268	3.81372	1.9312	0.014725
ENSSSCG00000010631		12288.2	3233.54	3.80026	1.9261	0.019029
Novel02069		37.6452	9.91667	3.79605	1.9245	0.0016989
Novel01309		12.2985	3.24992	3.78423	1.92	0.035764
ENSSSCG00000023049		25.959	6.87667	3.77506	1.9165	0.0079857
ENSSSCG00000026798		2980.74	792.901	3.75939	1.9105	5.6662e-05
ENSSSCG00000004891	SERPINB7	52.0311	13.8774	3.74924	1.9066	0.0012729
ENSSSCG00000009046		69.6126	18.615	3.73964	1.9029	0.04427
Novel00256		40.4935	10.8973	3.71587	1.8937	0.025954
Novel01590		36.3016	9.80129	3.70378	1.889	0.0023446
Novel01405		965.715	261.469	3.69353	1.885	0.0011701
ENSSSCG00000016002	CCDC141	18.3226	4.985	3.67565	1.878	0.013722
ENSSSCG00000004308		34.2081	9.31437	3.6726	1.8768	0.0044462
ENSSSCG00000009209		43.8241	12.0031	3.65102	1.8683	0.0021508
Novel00082		104.461	28.6579	3.64521	1.866	0.043502
ENSSSCG00000022403	AHSP	202.106	55.8067	3.62153	1.8566	0.00010948
ENSSSCG00000016943	ADAMTS6	108.552	29.9927	3.61927	1.8557	0.00035849
ENSSSCG00000025681		30.9963	8.56704	3.61802	1.8552	0.003942
ENSSSCG00000008937		19.9174	5.5198	3.60825	1.8513	0.022671
ENSSSCG00000010556	PAX2	15.1016	4.22645	3.57316	1.8372	0.029418
ENSSSCG00000003709		918.949	259.063	3.54725	1.8267	0.00014708
ENSSSCG00000005450		223.882	63.1992	3.54258	1.8248	0.0032354
ENSSSCG00000027221		15.0488	4.25283	3.53865	1.8232	0.042894
ENSSSCG00000007977	HBM	242.07	68.8039	3.51835	1.8149	0.022774
ENSSSCG00000011524	CHL1	657.46	188.313	3.49139	1.8038	0.00033774
ENSSSCG00000011470	ABHD6	750.134	215.03	3.48848	1.8026	0.0015381
ENSSSCG00000017358	SLC4A1	24.3715	6.99082	3.48631	1.8017	0.0092386
ENSSSCG00000007978		37479.5	10791.5	3.47304	1.7962	7.2522e-05
Novel02039		221.424	65.6809	3.37129	1.7533	0.00047064
ENSSSCG00000025414		183.25	54.4224	3.36708	1.7515	0.0004565
ENSSSCG00000004192		737.276	218.996	3.36662	1.7513	0.0001542
ENSSSCG00000003590	PTPRU	551.746	164.822	3.34754	1.7431	0.041986
Novel00485		616.239	184.694	3.33665	1.7384	0.00028107
ENSSSCG00000023264	IDH1	9555.89	2889.96	3.30649	1.7253	0.00059395
ENSSSCG00000023907		160.671	48.5932	3.30649	1.7253	0.00054316
ENSSSCG00000026894	NFE2L3	67.0284	20.3673	3.29094	1.7185	0.0019976
ENSSSCG00000017921	ZMYND15	118.951	36.1982	3.28615	1.7164	0.00075828
ENSSSCG00000027602		306.597	93.5358	3.27796	1.7128	0.00045734
ENSSSCG00000022614		28.5363	8.72363	3.27115	1.7098	0.010434
ENSSSCG00000020873		230.169	70.3801	3.27047	1.7095	0.00063453
ENSSSCG00000006763	BCL2L15	140.067	43.6311	3.21028	1.6827	0.00067743
ENSSSCG00000010495	ALDH18A1	714.21	222.868	3.20472	1.6802	0.0060121
ENSSSCG00000027903		947.802	296.204	3.19984	1.678	0.00038068
ENSSSCG00000022523		14.2698	4.46005	3.1994	1.6778	0.037673
ENSSSCG00000009755	AACS	3284.48	1031.97	3.18281	1.6703	0.00027442
ENSSSCG00000001698	CAPN11	73.1078	23.2369	3.14618	1.6536	0.0021981
ENSSSCG00000025662		16.4468	5.22936	3.14509	1.6531	0.040842
ENSSSCG00000012699		602.625	191.638	3.14465	1.6529	0.0010162
ENSSSCG00000021593		39.8731	12.7626	3.12423	1.6435	0.0075298
ENSSSCG00000011630		335.113	107.888	3.10609	1.6351	0.00065638
ENSSSCG00000005361	ALDH1B1	4575.77	1473.39	3.10566	1.6349	0.0022904
ENSSSCG00000012805	SPRY3	65.7255	21.3264	3.08186	1.6238	0.049883
ENSSSCG00000029912		37.8658	12.3133	3.07524	1.6207	0.0087059
ENSSSCG00000013072		10614.2	3454.93	3.07226	1.6193	0.030479
ENSSSCG00000014725		51021	16665.3	3.06142	1.6142	0.020655
ENSSSCG00000030712		38.1765	12.529	3.04702	1.6074	0.013937
ENSSSCG00000016183		95.0906	31.4826	3.02032	1.5947	0.0026798
Novel01345		1528.44	511.312	2.98928	1.5798	0.0036971
Novel01288		42.606	14.2909	2.98142	1.576	0.010003
ENSSSCG00000023436	KCTD14	105.338	35.3371	2.98101	1.5758	0.0017512
ENSSSCG00000010447		914.734	307.21	2.9775	1.5741	0.038798
Novel01373		57.2971	19.2715	2.97317	1.572	0.02367
ENSSSCG00000010948	CTSL	1000.25	337.509	2.9637	1.5674	0.0422
ENSSSCG00000004714	EPB42	27.5203	9.31347	2.95488	1.5631	0.016118
ENSSSCG00000028400		408.594	138.591	2.94813	1.5598	0.00071469
ENSSSCG00000021661		355.941	120.998	2.9418	1.5567	0.0010405
ENSSSCG00000030921		16.3886	5.57574	2.93936	1.5555	0.044442
Novel02256		75.4218	25.7784	2.92574	1.5488	0.0047093
ENSSSCG00000001555	SLC26A8	89.0325	30.4658	2.92229	1.5471	0.017219
ENSSSCG00000026520	STS	80.0293	27.3971	2.92108	1.5465	0.0047496
ENSSSCG00000009931	MVK	7794.76	2676.84	2.91198	1.542	0.021831
Novel01428		23.8761	8.19959	2.91178	1.5419	0.031106
ENSSSCG00000004434	FRK	131.6	45.5453	2.88946	1.5308	0.022356
ENSSSCG00000024172	PAFAH2	2315.33	803.767	2.88066	1.5264	0.011692
ENSSSCG00000004624	MAPK6	3732.27	1296.37	2.87906	1.5256	0.027664
ENSSSCG00000015231		4094.96	1426.48	2.87069	1.5214	0.0047651
ENSSSCG00000015294	CR1L	661.382	230.416	2.8703	1.5212	0.039482
Novel01437		322.582	113.494	2.84238	1.5071	0.003139
ENSSSCG00000001697	TMEM63B	1833.45	647.633	2.83098	1.5013	0.033592
Novel01913		33.4292	11.8518	2.8206	1.496	0.019519
ENSSSCG00000028335		35.1403	12.5491	2.80014	1.4855	0.016859
ENSSSCG00000003498	UBXN10	44.2408	15.8724	2.78736	1.4789	0.029983
ENSSSCG00000022009		1413.2	507.479	2.78466	1.4775	0.012635
ENSSSCG00000009237	HPSE	279.443	100.636	2.77676	1.4734	0.0021486
ENSSSCG00000008754		389.989	140.457	2.77656	1.4733	0.0018013
Novel01287		217.391	78.7075	2.76197	1.4657	0.0090356
ENSSSCG00000004886	CDH7	139.718	50.5954	2.7614	1.4654	0.0032327
Novel01916		41.3089	15.0678	2.74157	1.455	0.027069
ENSSSCG00000017914	GLTPD2	610.559	222.863	2.73967	1.454	0.0016923
ENSSSCG00000007269	PXMP4	125.989	46.0124	2.73815	1.4532	0.0052449
Novel02498		38.956	14.3446	2.71565	1.4413	0.014835
ENSSSCG00000003893		9982.37	3678.9	2.7134	1.4401	0.031664
ENSSSCG00000004560		35.9065	13.3054	2.69858	1.4322	0.016424
ENSSSCG00000005067	C14orf105	63.7159	23.6665	2.69223	1.4288	0.0092967
ENSSSCG00000027438		51.6548	19.22	2.68757	1.4263	0.0095415
Novel01972		29.5537	11.0284	2.67975	1.4221	0.039332
ENSSSCG00000005391		123.106	46.0187	2.67511	1.4196	0.0055098
ENSSSCG00000006512		7429.44	2784.41	2.66826	1.4159	0.0084755
ENSSSCG00000029558	EXTL1	4750.81	1785.65	2.6605	1.4117	0.0065079
ENSSSCG00000026022		112.019	42.1225	2.6594	1.4111	0.0083337
ENSSSCG00000025226	UGT2A3	7689.07	2892.71	2.65811	1.4104	0.0031399
ENSSSCG00000021739	HSD17B12	2897.29	1090.26	2.65737	1.41	0.0019114
Novel00645		1503.09	569.64	2.63865	1.3998	0.025179
ENSSSCG00000002853	C19orf12	71.9241	27.3814	2.62679	1.3933	0.020149
ENSSSCG00000010819	SLC30A10	523.407	199.345	2.6257	1.3927	0.0026502
ENSSSCG00000000289		39.1208	14.9223	2.6217	1.3905	0.018255
ENSSSCG00000017561		3089.07	1182.27	2.61281	1.3856	0.017379
ENSSSCG00000023930		82.101	31.5703	2.60052	1.3788	0.0062201
Novel00536		20.0386	7.70907	2.59944	1.3782	0.039711
ENSSSCG00000026607		180.056	69.3222	2.59746	1.3771	0.0042527
ENSSSCG00000004390	SESN1	595.476	229.436	2.59548	1.376	0.0028068
ENSSSCG00000016570	TSPAN33	188.987	73.1933	2.58202	1.3685	0.0055603
ENSSSCG00000015402		1777.91	693.175	2.5649	1.3589	0.0015492
ENSSSCG00000010017	SMTN	2753.38	1074.75	2.56187	1.3572	0.00229
ENSSSCG00000015476	CHI3L1	51.7576	20.2241	2.55921	1.3557	0.015583
ENSSSCG00000012345		1163.25	456.875	2.54612	1.3483	0.0098459
ENSSSCG00000012895		66.3062	26.0572	2.54471	1.3475	0.011153
ENSSSCG00000017250		771.838	303.742	2.54118	1.3455	0.0035567
ENSSSCG00000010224		25.9808	10.2286	2.53995	1.3448	0.0495
ENSSSCG00000001092		2506.73	988.705	2.53538	1.3422	0.0025783
ENSSSCG00000028676		62.9542	24.8551	2.53292	1.3408	0.011519
ENSSSCG00000022976		92.7073	36.7889	2.51996	1.3334	0.0068845
ENSSSCG00000015955	ITGA6	430.603	170.978	2.51839	1.3325	0.0035423
ENSSSCG00000003417		281.825	112.063	2.5149	1.3305	0.038682
ENSSSCG00000000515		1102.62	439.506	2.5088	1.327	0.0033947
Novel00164		24.8708	9.97985	2.49217	1.3174	0.046208
ENSSSCG00000002868		3393.2	1363.51	2.48854	1.3153	0.0039652
Novel00775		83.3803	33.5694	2.48389	1.3126	0.014578
ENSSSCG00000009742	ULK1	3396.61	1373.45	2.47306	1.3063	0.0047738
ENSSSCG00000007132		5413.03	2189.25	2.47255	1.306	0.0030163
Novel00861		113.128	45.8112	2.46947	1.3042	0.0070057
ENSSSCG00000029414		30.6803	12.4295	2.46827	1.3035	0.044259
ENSSSCG00000015630		123.98	50.2439	2.46759	1.3031	0.049915
ENSSSCG00000023566		327.703	133.056	2.46297	1.3004	0.0053595
ENSSSCG00000005975	MTSS1	1469.63	598.073	2.45734	1.2971	0.0035438
Novel00204		182.081	74.1757	2.45479	1.2956	0.0067691
Novel02393		45.3305	18.4766	2.45343	1.2948	0.026701
ENSSSCG00000016568	AHCYL2	69.7801	28.4645	2.45156	1.2937	0.013524
ENSSSCG00000016196	VIL1	3093.77	1272.31	2.43159	1.2819	0.0051577
ENSSSCG00000005199		1770.72	729.378	2.42772	1.2796	0.0047274
ENSSSCG00000026261	FBXO17	42.3461	17.453	2.42637	1.2788	0.028012
ENSSSCG00000028503		160.951	66.4357	2.42267	1.2766	0.027784
ENSSSCG00000026417	EPS8L1	222.172	91.8831	2.41798	1.2738	0.0094524
Novel00065		25.2368	10.4413	2.41697	1.2732	0.04608
ENSSSCG00000002475		8876.26	3688.79	2.40627	1.2668	0.0093215
ENSSSCG00000003377	ACOT7	183.733	76.3752	2.40561	1.2664	0.0090628
ENSSSCG00000013599		4298.24	1795.28	2.39413	1.2595	0.014131
ENSSSCG00000000194		443.376	185.959	2.38419	1.2535	0.0057758
ENSSSCG00000016824		2243.03	940.899	2.38386	1.2533	0.015513
ENSSSCG00000030260	PFN2	642.075	269.386	2.38353	1.2531	0.013159
ENSSSCG00000027453		129.148	54.1919	2.3832	1.2529	0.019563
ENSSSCG00000030304		591.184	248.299	2.38089	1.2515	0.0061229
ENSSSCG00000023898		686.061	288.171	2.38072	1.2514	0.011212
ENSSSCG00000011574		138.863	58.669	2.3669	1.243	0.010199
Novel01401		34.2958	14.499	2.36543	1.2421	0.037695
ENSSSCG00000010215		84.7893	35.9452	2.35888	1.2381	0.044043
ENSSSCG00000003201	ATF5	19086.9	8094.03	2.35806	1.2376	0.0051586
ENSSSCG00000017767		36.7811	15.6003	2.35773	1.2374	0.044417
ENSSSCG00000016569	SMO	160.532	68.198	2.35398	1.2351	0.012164
Novel02048		69.6225	29.6025	2.35186	1.2338	0.019087
Novel00368		191.607	81.6415	2.34697	1.2308	0.012986
ENSSSCG00000011680	PLS1	798.191	340.273	2.34567	1.23	0.009902
ENSSSCG00000024250		101.534	43.4531	2.33658	1.2244	0.027758
ENSSSCG00000023021		45.824	19.6791	2.3285	1.2194	0.040058
ENSSSCG00000006982	ZDHHC2	128.065	55.2399	2.31835	1.2131	0.017523
Novel00310		415.191	179.674	2.31081	1.2084	0.0081792
ENSSSCG00000001835	ABHD2	3270.28	1416.13	2.30937	1.2075	0.0077024
ENSSSCG00000020860		223.752	96.984	2.30713	1.2061	0.018211
ENSSSCG00000005627		105.528	45.7824	2.30505	1.2048	0.015852
ENSSSCG00000023247		2364.73	1026.02	2.30473	1.2046	0.036905
ENSSSCG00000016539		239.703	104.135	2.30186	1.2028	0.020129
ENSSSCG00000003941	SZT2	1477.59	642.61	2.29931	1.2012	0.0067759
ENSSSCG00000016822	AMACR	3704.41	1611.44	2.29883	1.2009	0.0090614
ENSSSCG00000029868		83.2565	36.2188	2.29867	1.2008	0.020164
ENSSSCG00000010456	PANK1	1540.79	670.426	2.29819	1.2005	0.007301
ENSSSCG00000003668	MYCL	256.471	111.9	2.29199	1.1966	0.016466
ENSSSCG00000015525	TOR3A	191.387	83.5093	2.29183	1.1965	0.01313
ENSSSCG00000004823	LRRK1	188.267	82.1797	2.29088	1.1959	0.012744
ENSSSCG00000024778		6685.96	2924.46	2.28628	1.193	0.036401
ENSSSCG00000010056		271.668	119.271	2.27774	1.1876	0.01362
ENSSSCG00000023508		1091.78	479.355	2.27758	1.1875	0.010431
ENSSSCG00000003889		761.68	334.509	2.27695	1.1871	0.049265
ENSSSCG00000016933	ELOVL7	51.9074	22.8592	2.2708	1.1832	0.026796
Novel00524		173.081	76.3767	2.26608	1.1802	0.015475
ENSSSCG00000000530	FGD4	353.677	156.418	2.26106	1.177	0.0090589
ENSSSCG00000006680	HFE2	2835.45	1257.15	2.25543	1.1734	0.019563
ENSSSCG00000016416		145.911	64.6948	2.25543	1.1734	0.017634
ENSSSCG00000004194		60.6813	26.9831	2.24887	1.1692	0.039075
ENSSSCG00000011557		422.026	188.539	2.23845	1.1625	0.034511
ENSSSCG00000001234	TRIM10	150.594	67.3832	2.23488	1.1602	0.017839
ENSSSCG00000003942		86.5533	38.8841	2.22592	1.1544	0.035141
ENSSSCG00000015016		68.0409	30.7316	2.21407	1.1467	0.035198
Novel01747		385.264	174.676	2.20564	1.1412	0.022208
ENSSSCG00000002410		109.947	49.8586	2.20519	1.1409	0.019259
ENSSSCG00000014328	GFRA3	66.2984	30.0774	2.20427	1.1403	0.03663
ENSSSCG00000004576	RORA	765.965	347.573	2.20381	1.14	0.03746
ENSSSCG00000015872		141.387	64.2522	2.20045	1.1378	0.021135
ENSSSCG00000025869		288.335	131.245	2.19695	1.1355	0.015022
ENSSSCG00000011746	SKIL	823.731	375.223	2.19527	1.1344	0.0095475
ENSSSCG00000005403		90.003	41.0109	2.19466	1.134	0.027201
ENSSSCG00000006940		881.456	401.773	2.1939	1.1335	0.012619
ENSSSCG00000012000		1827.04	833.492	2.19208	1.1323	0.01139
ENSSSCG00000029803	KDM2B	113.401	51.7852	2.1898	1.1308	0.026099
Novel00348		76.8111	35.1742	2.18374	1.1268	0.034048
ENSSSCG00000008237		2088.02	956.487	2.18298	1.1263	0.012106
ENSSSCG00000014130	ACOT12	235.086	107.705	2.18268	1.1261	0.017167
ENSSSCG00000004280	RIMS1	192.966	88.4597	2.18147	1.1253	0.020929
Novel00533		879.027	403.174	2.18026	1.1245	0.013128
ENSSSCG00000012572		114.089	52.4049	2.17709	1.1224	0.02442
ENSSSCG00000022789		817.273	375.534	2.17633	1.1219	0.012613
ENSSSCG00000006955	GSDMD	770.643	354.381	2.17468	1.1208	0.016383
ENSSSCG00000029281		65.1985	29.9878	2.17422	1.1205	0.040723
ENSSSCG00000005371	HEMGN	81.0662	37.3765	2.16895	1.117	0.028813
ENSSSCG00000008962	EREG	127.921	59.0364	2.16685	1.1156	0.027557
ENSSSCG00000007492		1376.45	635.694	2.1652	1.1145	0.016888
ENSSSCG00000026279	DAPK1	212.074	98.548	2.15203	1.1057	0.016327
ENSSSCG00000023585		701.539	325.986	2.15203	1.1057	0.028434
ENSSSCG00000030241		3750.9	1747	2.14712	1.1024	0.02152
ENSSSCG00000016216		111.818	52.3963	2.13406	1.0936	0.027349
ENSSSCG00000000839	ALDH1L2	714.116	334.824	2.13288	1.0928	0.017942
ENSSSCG00000021181	DHCR7	4729.45	2222.54	2.128	1.0895	0.015833
ENSSSCG00000025560		3662.13	1723.59	2.12476	1.0873	0.014819
ENSSSCG00000009816	P2RX4	411.58	194.076	2.12079	1.0846	0.020285
ENSSSCG00000028960		3154.18	1488.21	2.11946	1.0837	0.016411
ENSSSCG00000027764		60.1506	28.4448	2.11462	1.0804	0.037556
ENSSSCG00000017068	FAXDC2	833.879	394.657	2.11286	1.0792	0.0168
Novel02249		384.761	182.375	2.10979	1.0771	0.022624
ENSSSCG00000023333		2251.36	1067.12	2.10979	1.0771	0.015469
Novel02241		67.3513	31.9319	2.10921	1.0767	0.04699
ENSSSCG00000014089	F2RL2	73.6712	34.9414	2.10848	1.0762	0.048368
ENSSSCG00000015797		566.735	269.497	2.10293	1.0724	0.017568
Novel00679		233.732	111.24	2.10118	1.0712	0.023582
ENSSSCG00000027478	PPCDC	112.874	54.0285	2.08913	1.0629	0.036697
ENSSSCG00000009942		5520.64	2644.6	2.08753	1.0618	0.021136
ENSSSCG00000005609		209.997	100.63	2.08681	1.0613	0.025962
ENSSSCG00000012889	CHKA	716.601	344.038	2.08291	1.0586	0.045968
ENSSSCG00000010042	ZNF280B	78.3653	37.7595	2.07542	1.0534	0.041004
ENSSSCG00000012157	PHKA2	1345.81	648.898	2.07398	1.0524	0.037397
Novel00084		660.893	319.016	2.07168	1.0508	0.020821
ENSSSCG00000009759		3044.86	1470.3	2.07096	1.0503	0.021788
ENSSSCG00000027230	SLC35G1	1002.26	484.025	2.07067	1.0501	0.030294
ENSSSCG00000017690		4349.31	2118.05	2.05338	1.038	0.019184
ENSSSCG00000024583		86.0277	41.9198	2.05224	1.0372	0.042918
ENSSSCG00000006287		510.367	248.959	2.04997	1.0356	0.026307
Novel00592		257.997	126.185	2.04457	1.0318	0.033332
ENSSSCG00000011977	DCBLD2	63.123	30.89	2.04344	1.031	0.046767
ENSSSCG00000000591	PIK3C2G	318.213	155.75	2.04316	1.0308	0.025121
ENSSSCG00000009851	PEBP1	28638.2	14057.3	2.03722	1.0266	0.032375
Novel02404		340.447	167.184	2.03637	1.026	0.023361
ENSSSCG00000026542	FIGN	108.311	53.4912	2.02483	1.0178	0.037216
ENSSSCG00000029837		583.875	288.568	2.02329	1.0167	0.025525
ENSSSCG00000008755		249.469	123.387	2.02188	1.0157	0.035115
ENSSSCG00000024809		469.653	232.601	2.01908	1.0137	0.028576
ENSSSCG00000028620		1816.69	899.935	2.01866	1.0134	0.028735
ENSSSCG00000010332		118.092	58.5561	2.0167	1.012	0.039678
ENSSSCG00000016117	CARF	217.488	107.963	2.01447	1.0104	0.03263
ENSSSCG00000011474	PXK	1056.46	526.014	2.00847	1.0061	0.036265
ENSSSCG00000010950		191.694	95.7402	2.00222	1.0016	0.032168
ENSSSCG00000019572		129.982	261.614	0.496856	-1.0091	0.028471
ENSSSCG00000006655	CIART	62.7709	127.233	0.493356	-1.0193	0.030555
ENSSSCG00000024055	TECPR2	195.054	396.308	0.49216	-1.0228	0.021473
ENSSSCG00000010322	ZNF503	42.4082	86.3891	0.4909	-1.0265	0.037932
Novel00156		38.8919	79.5374	0.488964	-1.0322	0.048203
ENSSSCG00000031023	CD24	38.9246	79.9129	0.487103	-1.0377	0.049458
ENSSSCG00000029576	ZNF239	108.21	224.17	0.4827	-1.0508	0.025548
ENSSSCG00000015894		2880.11	5997.18	0.480231	-1.0582	0.019357
ENSSSCG00000001411		1123.22	2354.88	0.47698	-1.068	0.014574
ENSSSCG00000022256	C10orf10	42.4766	89.6635	0.473718	-1.0779	0.031537
ENSSSCG00000001081	SOX4	41.9409	88.9064	0.471752	-1.0839	0.034013
Novel01628		31.9183	68.0609	0.468981	-1.0924	0.039089
ENSSSCG00000010437	PAPSS2	1274.37	2729.49	0.466905	-1.0988	0.011958
ENSSSCG00000010529		42.0597	90.3382	0.46558	-1.1029	0.041133
ENSSSCG00000011941	IFT57	130.812	281.09	0.465386	-1.1035	0.020318
ENSSSCG00000028552	BHLHE41	80.2472	172.775	0.464452	-1.1064	0.045741
ENSSSCG00000022645	H2AFX	55.33	119.463	0.463166	-1.1104	0.024377
Novel02524		196.758	425.224	0.462716	-1.1118	0.032772
ENSSSCG00000017551		69.0128	149.416	0.461883	-1.1144	0.019245
Novel01731		25.5824	55.7371	0.458979	-1.1235	0.04801
ENSSSCG00000023434	PPM1L	69.5013	151.825	0.457772	-1.1273	0.018698
Novel02246		21.5548	47.2234	0.456441	-1.1315	0.043065
Novel00789		72.4719	159.248	0.455082	-1.1358	0.017258
Novel01071		46.0881	101.477	0.454169	-1.1387	0.026094
ENSSSCG00000009676		209.317	468.965	0.446335	-1.1638	0.042835
ENSSSCG00000004674	SHF	31.0312	69.7671	0.444791	-1.1688	0.022844
ENSSSCG00000005312	SIT1	22.7123	51.1594	0.44396	-1.1715	0.035711
ENSSSCG00000009801	BCL7A	21.7142	48.9234	0.443836	-1.1719	0.042594
ENSSSCG00000001652		2317.51	5238.9	0.442362	-1.1767	0.012377
ENSSSCG00000027546		22.326	50.4884	0.442209	-1.1772	0.038875
ENSSSCG00000006560	CREB3L4	56.9111	128.716	0.442148	-1.1774	0.026416
ENSSSCG00000016703		24.1699	54.805	0.441015	-1.1811	0.03126
ENSSSCG00000012319		27.9701	63.7116	0.439002	-1.1877	0.024025
ENSSSCG00000011201	SATB1	105.469	243.143	0.433769	-1.205	0.029276
ENSSSCG00000025822	SFRP1	251.367	580.218	0.433228	-1.2068	0.0081417
ENSSSCG00000003076		31.4684	73.0665	0.430684	-1.2153	0.022892
ENSSSCG00000016686	PRR15	26.1855	61.0747	0.428747	-1.2218	0.022815
ENSSSCG00000025041		19.1588	45.0657	0.425137	-1.234	0.031269
ENSSSCG00000012832	MXRA5	90.0966	213.585	0.42182	-1.2453	0.011814
ENSSSCG00000017448	KRT19	41.8446	99.746	0.419517	-1.2532	0.013962
ENSSSCG00000014310		43.2734	103.851	0.416677	-1.263	0.011579
ENSSSCG00000013231	C1QTNF4	12.3358	29.6275	0.416359	-1.2641	0.045397
ENSSSCG00000009216		91.7323	220.771	0.415523	-1.267	0.0085881
ENSSSCG00000000810	AMIGO2	16.185	38.975	0.415264	-1.2679	0.047226
ENSSSCG00000014232		13.9029	33.533	0.414602	-1.2702	0.041686
ENSSSCG00000003699	GREB1L	63.3363	152.876	0.414286	-1.2713	0.0085259
ENSSSCG00000005979	ANXA13	49.8707	120.473	0.413971	-1.2724	0.011035
ENSSSCG00000030143		34.959	84.6168	0.413139	-1.2753	0.014611
ENSSSCG00000029401		342.765	832.55	0.41171	-1.2803	0.020833
ENSSSCG00000017769		12.2796	29.8871	0.410855	-1.2833	0.045236
ENSSSCG00000011687	C3orf58	58.0285	141.779	0.409291	-1.2888	0.039717
ENSSSCG00000006969	KIAA1456	82.7229	202.908	0.407677	-1.2945	0.0095155
Novel01716		15.9106	39.0398	0.407536	-1.295	0.030835
ENSSSCG00000024489		10.4696	26.2097	0.399454	-1.3239	0.04662
ENSSSCG00000021657		13.3072	33.6638	0.395295	-1.339	0.031001
ENSSSCG00000006413	FCER1A	28.1146	71.222	0.394747	-1.341	0.014797
ENSSSCG00000000654	CLECL1	65.9581	167.137	0.394638	-1.3414	0.0055639
ENSSSCG00000010526	AVPI1	247.853	635.564	0.389961	-1.3586	0.0050814
ENSSSCG00000003318		74.2163	191.862	0.386811	-1.3703	0.0041019
ENSSSCG00000021006		103.129	267.671	0.385286	-1.376	0.011202
ENSSSCG00000020439		10.3819	27.0269	0.384139	-1.3803	0.027849
Novel01438		11.8724	30.9428	0.383687	-1.382	0.032127
ENSSSCG00000023690		1153.49	3018.43	0.382147	-1.3878	0.0023116
ENSSSCG00000008842		49.6636	130.349	0.38101	-1.3921	0.0064288
ENSSSCG00000025858		20.7289	54.4626	0.380614	-1.3936	0.013159
Novel00210		932.811	2454.8	0.380008	-1.3959	0.014637
ENSSSCG00000020929		14.5646	38.3865	0.379429	-1.3981	0.017054
ENSSSCG00000010892	KCNT2	34.2056	90.2408	0.37906	-1.3995	0.0055597
ENSSSCG00000015699	ACMSD	202.89	542.179	0.374205	-1.4181	0.0019821
ENSSSCG00000017793		8.16667	21.9717	0.371697	-1.4278	0.037519
Novel01920		9.71877	26.1677	0.371414	-1.4289	0.027138
Novel01463		66.5641	180.148	0.369488	-1.4364	0.0059225
ENSSSCG00000023498		28.3269	76.6937	0.36936	-1.4369	0.0063741
ENSSSCG00000002007		23.4385	63.5413	0.368874	-1.4388	0.049632
ENSSSCG00000018029		16.5757	46.2039	0.358762	-1.4789	0.01259
ENSSSCG00000006238	CYP7A1	1562.8	4392.34	0.355791	-1.4909	0.022433
ENSSSCG00000021222		55.824	157.809	0.353749	-1.4992	0.0026728
ENSSSCG00000011125	GATA3	14.9863	42.6976	0.35099	-1.5105	0.010842
Novel01568		31.8086	90.9198	0.349848	-1.5152	0.0029253
ENSSSCG00000023167		107.186	307.577	0.348493	-1.5208	0.013699
ENSSSCG00000016613	AASS	1186.37	3408.1	0.348106	-1.5224	0.010693
ENSSSCG00000016871		7.57921	22.1969	0.341463	-1.5502	0.030095
ENSSSCG00000010971	ARID3C	9.64314	28.2509	0.341344	-1.5507	0.019359
Novel01149		5.69795	16.8032	0.339104	-1.5602	0.042569
Novel01493		53.5185	158.471	0.33772	-1.5661	0.0021092
ENSSSCG00000009488	SLITRK5	9.79243	29.06	0.336972	-1.5693	0.024498
Novel00398		6.10415	18.2774	0.333972	-1.5822	0.034405
ENSSSCG00000003890		26.1138	78.4522	0.332863	-1.587	0.026789
Novel00242		6.08573	18.4117	0.330541	-1.5971	0.035063
ENSSSCG00000006546		15.0086	45.4915	0.329923	-1.5998	0.0058101
ENSSSCG00000030379	YPEL1	8.3717	25.4544	0.328895	-1.6043	0.016732
ENSSSCG00000000736		88.7393	271.925	0.326329	-1.6156	0.010118
ENSSSCG00000002267	RGMA	4.97764	15.3429	0.324435	-1.624	0.038307
ENSSSCG00000006780	WNT2B	50.0992	154.625	0.324008	-1.6259	0.00080376
Novel00308		5.9001	18.2913	0.322574	-1.6323	0.031662
ENSSSCG00000009638	RHOBTB2	26.386	82.606	0.319414	-1.6465	0.0015492
Novel00075		29.0593	92.0257	0.315782	-1.663	0.001336
ENSSSCG00000012409		6.12256	19.5331	0.313448	-1.6737	0.018876
ENSSSCG00000011463	IL17RD	5.29225	17.1527	0.308534	-1.6965	0.030316
ENSSSCG00000007482		71.296	234.615	0.303886	-1.7184	0.00079681
Novel00785		226.355	747.946	0.302645	-1.7243	0.00022865
ENSSSCG00000025134	FAM171B	26.2353	87.1933	0.300888	-1.7327	0.0010846
Novel01160		34.1839	114.141	0.299494	-1.7394	0.00071689
Novel00835		6.9883	23.6016	0.296088	-1.7559	0.010491
ENSSSCG00000014214	TRIM36	4.40712	14.9156	0.295473	-1.7589	0.031602
Novel01756		19.8389	67.5368	0.293758	-1.7673	0.029708
ENSSSCG00000012376	GDPD2	47.6137	163.702	0.290861	-1.7816	0.035091
ENSSSCG00000014982		61.8053	214.838	0.287693	-1.7974	0.00049027
Novel01730		9.34891	32.893	0.284224	-1.8149	0.038105
ENSSSCG00000002294	ARG2	153.745	548.03	0.280544	-1.8337	0.0018922
ENSSSCG00000015084	FXYD2	38.4306	137.424	0.279651	-1.8383	0.030877
Novel00709		8.05758	29.1651	0.276279	-1.8558	0.041451
ENSSSCG00000001860	NRG4	23.1922	84.2455	0.275285	-1.861	0.024005
Novel01201		11.727	43.5062	0.269545	-1.8914	0.0018833
ENSSSCG00000029536		3.0242	11.223	0.269471	-1.8918	0.048079
Novel02414		3.28111	12.5634	0.261159	-1.937	0.033257
Novel00755		4.00142	15.322	0.261159	-1.937	0.043527
ENSSSCG00000013010	NAALADL1	20.6153	79.2976	0.259967	-1.9436	0.039522
ENSSSCG00000009593	ROR2	3.26269	12.7947	0.255005	-1.9714	0.029172
ENSSSCG00000025188		101.531	399.182	0.254352	-1.9751	3.4497e-05
ENSSSCG00000026123		2500.45	9835.08	0.254247	-1.9757	0.00096588
Novel01161		3.63304	14.4663	0.251146	-1.9934	0.022556
ENSSSCG00000006288		54.0906	220.66	0.245127	-2.0284	2.8121e-05
ENSSSCG00000000910		92.9163	388.655	0.239069	-2.0645	0.017401
ENSSSCG00000005292		11.9286	50.1177	0.238011	-2.0709	0.038166
Novel00243		3.83322	16.1638	0.237155	-2.0761	0.012997
ENSSSCG00000002624		3.67085	15.9534	0.230095	-2.1197	0.0093271
ENSSSCG00000023404	FAM89A	88.125	384.541	0.229172	-2.1255	0.018685
ENSSSCG00000006185	KCNB2	6.72992	29.6531	0.226958	-2.1395	0.0012825
ENSSSCG00000008634	ATP6V1C2	2.63643	11.7283	0.224798	-2.1533	0.025669
ENSSSCG00000020969		427.202	1940.25	0.220172	-2.1833	2.6324e-06
Novel00748		5.75271	26.1915	0.219638	-2.1868	0.033763
ENSSSCG00000000748	IQSEC3	22.8882	104.561	0.218893	-2.1917	0.0017681
ENSSSCG00000017283	CD79B	3.66938	17.0933	0.214671	-2.2198	0.030501
ENSSSCG00000027715		4.70183	22.5181	0.208801	-2.2598	0.0023798
ENSSSCG00000003234		1.6408	8.02012	0.204589	-2.2892	0.049069
ENSSSCG00000001901	CYP1A2	6665.44	33009.1	0.201926	-2.3081	0.0051387
ENSSSCG00000024306		21.4699	106.45	0.201688	-2.3098	0.0078101
Novel01779		122.155	614.844	0.198677	-2.3315	9.2856e-07
ENSSSCG00000002280	RAB15	26.9226	136.201	0.197661	-2.3389	5.1605e-06
ENSSSCG00000003777	SLC44A5	9.55394	50.4005	0.189557	-2.3993	0.037241
Novel02529		23.9069	126.49	0.189005	-2.4035	0.0017983
ENSSSCG00000003123	BSPH1	63.9817	352.363	0.181583	-2.4613	0.00039011
ENSSSCG00000015638	C1orf186	2.34171	13.2602	0.176593	-2.5015	0.021454
Novel02481		1.60348	9.10625	0.17608	-2.5057	0.024458
ENSSSCG00000027496		8.57188	48.7601	0.175799	-2.508	4.7982e-05
Novel01894		8.79294	50.8263	0.172995	-2.5312	6.5123e-05
ENSSSCG00000017343		5.07218	29.3568	0.172779	-2.533	0.016857
Novel00684		8.20786	48.4113	0.16954	-2.5603	0.01203
ENSSSCG00000012298		8.39159	50.5188	0.166109	-2.5898	0.027093
Novel02469		2.71058	16.7965	0.161376	-2.6315	0.0022372
ENSSSCG00000009798	B3GNT4	11.6722	72.8952	0.160128	-2.6427	0.026121
ENSSSCG00000003690	DLGAP1	1.99076	12.6771	0.15704	-2.6708	0.0050798
ENSSSCG00000016719	STK31	1.32717	8.48685	0.156377	-2.6769	0.018316
Novel00470		3.96508	25.5596	0.155135	-2.6884	0.00036671
Novel00535		21.9242	147.261	0.148878	-2.7478	2.9246e-07
ENSSSCG00000015267	FMO2	1.01453	6.93171	0.146361	-2.7724	0.032883
Novel02421		0.995627	7.38419	0.134829	-2.8908	0.022332
Novel01605		3.35526	24.9367	0.134549	-2.8938	0.0098552
Novel01994		5.25444	40.0084	0.131333	-2.9287	0.0047928
ENSSSCG00000013116		3.33881	25.8705	0.129059	-2.9539	0.01161
Novel01233		1.01453	7.90914	0.128274	-2.9627	0.039197
ENSSSCG00000009194	HPGDS	1.01404	8.2613	0.122742	-3.0263	0.014012
ENSSSCG00000009751	FZD10	1.05136	9.01408	0.116637	-3.0999	0.0076968
Novel01010		2.0659	18.08	0.114261	-3.1296	0.00039075
Novel01465		5.99464	53.3816	0.112298	-3.1546	3.288e-05
ENSSSCG00000007793		0.682495	6.08009	0.112251	-3.1552	0.033134
Novel02091		2.01016	18.1905	0.110506	-3.1778	0.0006603
Novel00936		32.4083	293.562	0.110399	-3.1792	0.0013633
ENSSSCG00000013584	PRR36	0.626265	5.76326	0.108668	-3.202	0.044435
ENSSSCG00000021713	TCN1	5.64468	56.9216	0.0991667	-3.334	0.017559
ENSSSCG00000029264		4.95923	51.4736	0.0963481	-3.3756	0.00076846
ENSSSCG00000029365	MSI1	0.995627	10.5222	0.0946207	-3.4017	0.0028074
ENSSSCG00000006716		348.124	3744.9	0.0929565	-3.4273	0.022286
ENSSSCG00000002462	COX8C	2.28548	26.1139	0.0875166	-3.5143	0.0076235
ENSSSCG00000001397		6.95048	82.0639	0.0846938	-3.5616	0.013566
ENSSSCG00000026248	PAQR4	3.96311	48.7407	0.0813113	-3.6204	0.0057087
Novel00801		2.94956	36.4913	0.0808281	-3.629	1.5424e-06
ENSSSCG00000010538	NKX2-3	0.350455	4.47748	0.0782698	-3.6754	0.044634
ENSSSCG00000025510		5.07267	66.4087	0.0763832	-3.7106	8.6076e-09
Novel00975		0.939397	12.6368	0.0743409	-3.7497	0.00081081
Novel01780		5.05229	71.6953	0.0704674	-3.8269	2.3155e-09
ENSSSCG00000017763		0.33204	5.13401	0.0646727	-3.9507	0.026349
Novel00840		4.66451	74.2948	0.0627822	-3.9935	0.013033
Novel01697		0.350455	6.31549	0.0554911	-4.1716	0.0094981
Novel01206		0.350455	6.32534	0.0554065	-4.1738	0.016277
ENSSSCG00000019556		54.6829	1003.82	0.0544736	-4.1983	0.0037226
ENSSSCG00000011747		0.313132	5.87604	0.0532897	-4.23	0.018766
ENSSSCG00000002543		1.73386	38.8621	0.0446158	-4.4863	5.3627e-07
ENSSSCG00000009312		0.350455	8.09576	0.0432877	-4.5299	0.0030053
Novel00519		0.33204	9.74308	0.0340807	-4.8749	0.00073613
ENSSSCG00000002542	DIO3	0.70091	41.9853	0.0166943	-5.9045	0.00046422
ENSSSCG00000029605		0.996119	1085.79	0.000917503	-10.09	1.189e-05
