# Supplementary material for: Transcriptomic analysis of Bama pig's liver in various nutritional states reveals a metabolic difference of fatty acids
Source: Royal Society of Chemistry journal article supplement (doi:10.1039/c7fo00937b), 2017-01-01
Supplement: c7fo00937b4.xlsx [file c7fo00937b4.xlsx]

## Sheet: 118DEGs
Table S4 F/C group and H/C group shared 118 DEGs
Gene_id	name	readcount Fast	readcount control	FoldChange	log2FoldChange	p-val	readcount HFD	readcount control	FoldChange	log2FoldChange	p-val
ENSSSCG00000001045	ELOVL2	628.994	6.0061	104.728	6.7105	6.2865e-05	26.422	5.56589	4.74728	2.2471	0.0016654
ENSSSCG00000028631	PIN1	27.7965	0.375796	73.9665	6.2088	2.2045e-08	27.0468	0.346382	78.081	6.2869	1.4965e-08
ENSSSCG00000022526		25.6645	0.38289	67.0284	6.0667	0.0025529	8.86611	0.356234	24.8884	4.6374	0.0014065
ENSSSCG00000024996		24.7292	0.375796	65.8038	6.0401	0.0061731	33.4078	0.346382	96.4494	6.5917	6.7264e-10
ENSSSCG00000014861	MOGAT2	48.338	1.45565	33.2066	5.0534	0.0045198	191.771	1.34929	142.123	7.151	0.0027748
Novel01717		9.38058	0.314068	29.8674	4.9005	0.011166	13.2209	0.290444	45.5191	5.5084	6.2224e-05
ENSSSCG00000006243	PENK	11.6498	0.696959	16.7153	4.0631	0.0010283	13.107	0.646678	20.2676	4.3411	0.00022439
ENSSSCG00000003900	DMBX1	32.7418	2.2673	14.441	3.8521	0.00051233	45.9492	2.0989	21.8915	4.4523	1.3127e-07
Novel01847		31.5306	2.22852	14.1487	3.8226	0.006282	51.4121	2.07161	24.8177	4.6333	0.00012029
Novel00353		132.001	10.396	12.6969	3.6664	1.2292e-05	70.4763	9.62225	7.32435	2.8727	0.029368
ENSSSCG00000015747		65.175	5.67618	11.482	3.5213	0.031292	37.275	5.25664	7.09105	2.826	0.039985
ENSSSCG00000030712		138.803	13.5191	10.2674	3.36	1.4454e-06	38.1765	12.529	3.04702	1.6074	0.013937
ENSSSCG00000022033	SLC46A1	76.1569	7.57644	10.0519	3.3294	0.023325	75.8834	7.01811	10.8123	3.4346	0.026803
Novel01307		10.4031	1.07985	9.63377	3.2681	0.02177	16.4041	1.00291	16.3566	4.0318	0.0043321
Novel01376		23.4441	2.5284	9.27212	3.2129	0.00079722	23.0269	2.34235	9.83074	3.2973	6.6503e-05
ENSSSCG00000006716	HMGCS2	35577.3	4053.3	8.77744	3.1338	1.7404e-12	348.124	3744.9	0.0929565	-3.4273	0.022286
Novel01590		75.7675	10.5724	7.16666	2.8413	7.54e-06	36.3016	9.80129	3.70378	1.889	0.0023446
ENSSSCG00000009937	ACACB	189.61	26.7555	7.08663	2.8251	2.3419e-06	260.765	24.7714	10.5268	3.396	0.038637
ENSSSCG00000016156	ACADL	5031.48	728.965	6.90241	2.7871	1.277e-10	3652.12	675.383	5.40764	2.435	8.4458e-05
ENSSSCG00000004194	ENPP3	168.812	29.1446	5.79215	2.5341	0.0036788	60.6813	26.9831	2.24887	1.1692	0.039075
ENSSSCG00000030146	UGGT2	10.4532	1.83854	5.68555	2.5073	0.014674	8.204	1.70553	4.81021	2.2661	0.03922
ENSSSCG00000027221		24.2547	4.59799	5.27511	2.3992	0.0046261	15.0488	4.25283	3.53865	1.8232	0.042894
ENSSSCG00000008237	RETSAT	5262.71	1033.04	5.09436	2.3489	7.8895e-08	2088.02	956.487	2.18298	1.1263	0.012106
ENSSSCG00000028620	ABCD3	4733.68	971.334	4.8733	2.2849	5.9666e-06	1816.69	899.935	2.01866	1.0134	0.028735
ENSSSCG00000002853	C19orf12	141.473	29.6029	4.77897	2.2567	0.010544	71.9241	27.3814	2.62679	1.3933	0.020149
ENSSSCG00000025541	ELOVL6	676.576	151.718	4.45956	2.1569	4.6292e-07	1121.8	140.642	7.97619	2.9957	0.035671
ENSSSCG00000025188		1903.05	431.043	4.41496	2.1424	0.0002446	101.531	399.182	0.254352	-1.9751	3.4497e-05
Novel01512		50.8459	12.1427	4.18724	2.066	0.0010231	43.5061	11.2535	3.86589	1.9508	0.0012842
ENSSSCG00000013072	FADS2	15213.7	3724.16	4.08518	2.0304	1.3728e-06	10614.2	3454.93	3.07226	1.6193	0.030479
ENSSSCG00000005391	TMEFF1	193.295	49.6475	3.89332	1.961	1.6985e-05	123.106	46.0187	2.67511	1.4196	0.0055098
ENSSSCG00000011557	CIDEC	769.136	203.617	3.77742	1.9174	1.249e-05	422.026	188.539	2.23845	1.1625	0.034511
ENSSSCG00000003201	ATF5	32663.5	8736.4	3.73886	1.9026	3.7777e-06	19086.9	8094.03	2.35806	1.2376	0.0051586
ENSSSCG00000001091	KIAA0319	131.553	35.3025	3.72645	1.8978	0.00064532	174.821	32.7205	5.34281	2.4176	1.9858e-06
ENSSSCG00000010556	PAX2	16.2759	4.55755	3.57118	1.8364	0.049321	15.1016	4.22645	3.57316	1.8372	0.029418
ENSSSCG00000023264	IDH1	11095.4	3118.59	3.55784	1.831	0.00010353	9555.89	2889.96	3.30649	1.7253	0.00059395
ENSSSCG00000025560	PGLYRP2	6462.5	1859.28	3.47569	1.7973	0.00011362	3662.13	1723.59	2.12476	1.0873	0.014819
ENSSSCG00000005609		373.133	108.768	3.43046	1.7784	4.589e-05	209.997	100.63	2.08681	1.0613	0.025962
ENSSSCG00000011685	PAQR9	430.343	135.26	3.1817	1.6698	8.4455e-05	820.518	125.409	6.54276	2.7099	6.1033e-05
Novel00256		35.9358	11.7599	3.05591	1.6116	0.008011	40.4935	10.8973	3.71587	1.8937	0.025954
ENSSSCG00000015525	TOR3A	270.267	90.1686	2.99738	1.5837	0.0043532	191.387	83.5093	2.29183	1.1965	0.01313
Novel02468		84.833	29.4411	2.88146	1.5268	0.017592	187.843	27.2758	6.88664	2.7838	1.0925e-07
Novel00980		25.5678	9.08341	2.81474	1.493	0.024721	34.5939	8.43546	4.10107	2.036	0.04675
ENSSSCG00000010456	PANK1	2007.84	723.818	2.77387	1.4719	0.00044082	1540.79	670.426	2.29819	1.2005	0.007301
ENSSSCG00000009237	HPSE	294.891	108.665	2.71377	1.4403	0.017447	279.443	100.636	2.77676	1.4734	0.0021486
Novel01903		177.064	67.2716	2.63207	1.3962	0.025081	288.379	62.2647	4.63157	2.2115	9.142e-06
ENSSSCG00000014328	GFRA3	83.2294	32.4671	2.56347	1.3581	0.0075128	66.2984	30.0774	2.20427	1.1403	0.03663
ENSSSCG00000012376	GDPD2	442.801	176.897	2.50325	1.3238	0.038212	47.6137	163.702	0.290861	-1.7816	0.035091
Novel02512		36.2783	14.8672	2.4402	1.287	0.040089	55.1023	13.7852	3.99723	1.999	0.0078112
ENSSSCG00000022976		95.677	39.7341	2.40794	1.2678	0.0063083	92.7073	36.7889	2.51996	1.3334	0.0068845
ENSSSCG00000017914	GLTPD2	577.153	240.68	2.39795	1.2618	0.0032916	610.559	222.863	2.73967	1.454	0.0016923
ENSSSCG00000023021		50.462	21.2191	2.37808	1.2498	0.025152	45.824	19.6791	2.3285	1.2194	0.040058
ENSSSCG00000001092	TDP2	2537.11	1067.49	2.37677	1.249	0.0025429	2506.73	988.705	2.53538	1.3422	0.0025783
ENSSSCG00000000194	TUBA1C	475.851	200.853	2.3692	1.2444	0.034421	443.376	185.959	2.38419	1.2535	0.0057758
ENSSSCG00000015955	ITGA6	424.122	184.73	2.29596	1.1991	0.032013	430.603	170.978	2.51839	1.3325	0.0035423
ENSSSCG00000017690	DHRS11	5218.05	2288.79	2.27979	1.1889	0.0035408	4349.31	2118.05	2.05338	1.038	0.019184
ENSSSCG00000001697	TMEM63B	1592.49	699.188	2.27758	1.1875	0.0045559	1833.45	647.633	2.83098	1.5013	0.033592
ENSSSCG00000028896	DIO1	2481.16	1121.44	2.21253	1.1457	0.0056052	5980.45	1039.57	5.75294	2.5243	5.8779e-08
ENSSSCG00000011470	ABHD6	512.362	232.131	2.20717	1.1422	0.026701	750.134	215.03	3.48848	1.8026	0.0015381
Novel00204		173.711	80.09	2.16895	1.117	0.01382	182.081	74.1757	2.45479	1.2956	0.0067691
ENSSSCG00000016943	ADAMTS6	68.4544	32.4345	2.11052	1.0776	0.028985	108.552	29.9927	3.61927	1.8557	0.00035849
ENSSSCG00000026607		156.316	74.8497	2.0884	1.0624	0.013492	180.056	69.3222	2.59746	1.3771	0.0042527
ENSSSCG00000028676		55.9767	26.8418	2.08537	1.0603	0.036097	62.9542	24.8551	2.53292	1.3408	0.011519
ENSSSCG00000014368		229.798	112.233	2.04755	1.0339	0.020196	796.466	103.968	7.66083	2.9375	2.4057e-09
ENSSSCG00000023247	OPTN	2265.18	1107.95	2.04443	1.0317	0.014849	2364.73	1026.02	2.30473	1.2046	0.036905
ENSSSCG00000021181	DHCR7	1197.54	2399.07	0.499169	-1.0024	0.012565	4729.45	2222.54	2.128	1.0895	0.015833
ENSSSCG00000025134	FAM171B	46.636	94.128	0.495446	-1.0132	0.034373	26.2353	87.1933	0.300888	-1.7327	0.0010846
ENSSSCG00000012832	MXRA5	113.884	230.754	0.493527	-1.0188	0.01578	90.0966	213.585	0.42182	-1.2453	0.011814
ENSSSCG00000006560	CREB3L4	65.9181	139.243	0.47339	-1.0789	0.037643	56.9111	128.716	0.442148	-1.1774	0.026416
ENSSSCG00000006655	CIART	64.3164	137.405	0.468071	-1.0952	0.011564	62.7709	127.233	0.493356	-1.0193	0.030555
ENSSSCG00000000654		83.2912	180.539	0.461339	-1.1161	0.01219	65.9581	167.137	0.394638	-1.3414	0.0055639
ENSSSCG00000006780	WNT2B	75.9744	167.144	0.454547	-1.1375	0.0087771	50.0992	154.625	0.324008	-1.6259	0.00080376
ENSSSCG00000011125	GATA3	19.9224	46.0972	0.432179	-1.2103	0.03304	14.9863	42.6976	0.35099	-1.5105	0.010842
ENSSSCG00000014982	MMP7	98.7105	232.24	0.425049	-1.2343	0.0035464	61.8053	214.838	0.287693	-1.7974	0.00049027
ENSSSCG00000012895		11.8146	28.1248	0.42007	-1.2513	0.045816	66.3062	26.0572	2.54471	1.3475	0.011153
ENSSSCG00000001234	TRIM10	30.1693	72.7051	0.414947	-1.269	0.046665	150.594	67.3832	2.23488	1.1602	0.017839
ENSSSCG00000000736	TEAD4	120.748	294.204	0.410428	-1.2848	0.041229	88.7393	271.925	0.326329	-1.6156	0.010118
ENSSSCG00000021006		118.661	289.245	0.410257	-1.2854	0.032783	103.129	267.671	0.385286	-1.376	0.011202
ENSSSCG00000005979	ANXA13	52.6009	130.114	0.404273	-1.3066	0.0055642	49.8707	120.473	0.413971	-1.2724	0.011035
ENSSSCG00000006238	CYP7A1	1842.22	4742.42	0.38845	-1.3642	0.031502	1562.8	4392.34	0.355791	-1.4909	0.022433
ENSSSCG00000017793		9.12127	23.7262	0.384432	-1.3792	0.03035	8.16667	21.9717	0.371697	-1.4278	0.037519
Novel00785		303.449	808.848	0.375166	-1.4144	0.014984	226.355	747.946	0.302645	-1.7243	0.00022865
ENSSSCG00000003318	GALP	77.5905	207.254	0.374386	-1.4174	0.00095343	74.2163	191.862	0.386811	-1.3703	0.0041019
ENSSSCG00000006288	SELP	88.8481	238.471	0.372574	-1.4244	0.0011458	54.0906	220.66	0.245127	-2.0284	2.8121e-05
Novel00156		31.3077	85.9422	0.3643	-1.4568	0.0019578	38.8919	79.5374	0.488964	-1.0322	0.048203
ENSSSCG00000021657	SATB2	12.9605	36.354	0.356506	-1.488	0.012825	13.3072	33.6638	0.395295	-1.339	0.031001
Novel01160		43.8157	123.288	0.355396	-1.4925	0.0013948	34.1839	114.141	0.299494	-1.7394	0.00071689
ENSSSCG00000025858		20.7885	58.8059	0.353504	-1.5002	0.0049611	20.7289	54.4626	0.380614	-1.3936	0.013159
Novel01894		19.4255	54.9499	0.353504	-1.5002	0.016432	8.79294	50.8263	0.172995	-2.5312	6.5123e-05
ENSSSCG00000017933		26.9205	79.9668	0.336645	-1.5707	0.0052866	405.34	73.9216	5.48351	2.4551	0.0006747
ENSSSCG00000010529	SFRP5	32.122	97.4702	0.329557	-1.6014	0.0033853	42.0597	90.3382	0.46558	-1.1029	0.041133
ENSSSCG00000016686	PRR15	21.1538	65.9782	0.320612	-1.6411	0.0016228	26.1855	61.0747	0.428747	-1.2218	0.022815
ENSSSCG00000012805	SPRY3	7.31078	23.0134	0.31767	-1.6544	0.015093	65.7255	21.3264	3.08186	1.6238	0.049883
ENSSSCG00000027496		16.6951	52.7114	0.316724	-1.6587	0.0020252	8.57188	48.7601	0.175799	-2.508	4.7982e-05
Novel00398		5.75041	19.7471	0.291204	-1.7799	0.019967	6.10415	18.2774	0.333972	-1.5822	0.034405
Novel01493		49.2364	171.025	0.287892	-1.7964	0.00036574	53.5185	158.471	0.33772	-1.5661	0.0021092
Novel02414		3.87585	13.57	0.285626	-1.8078	0.04343	3.28111	12.5634	0.261159	-1.937	0.033257
Novel02529		37.681	136.803	0.275438	-1.8602	0.0047983	23.9069	126.49	0.189005	-2.4035	0.0017983
Novel02038		3.8214	14.0359	0.272249	-1.877	0.0377	95.9012	13.0051	7.37427	2.8825	0.0013449
Novel01392		144.416	555.64	0.259913	-1.9439	0.019953	2038.75	515.067	3.95835	1.9849	0.0029442
Novel00709		8.11847	31.5645	0.257207	-1.959	0.039078	8.05758	29.1651	0.276279	-1.8558	0.041451
Novel01465		14.6751	57.7464	0.254123	-1.9764	0.005021	5.99464	53.3816	0.112298	-3.1546	3.288e-05
ENSSSCG00000014214	TRIM36	4.00069	16.1055	0.248411	-2.0092	0.016098	4.40712	14.9156	0.295473	-1.7589	0.031602
Novel00210		637.392	2652.47	0.240299	-2.0571	0.0015398	932.811	2454.8	0.380008	-1.3959	0.014637
ENSSSCG00000026149		477.51	2187.97	0.218242	-2.196	0.0090977	7977.1	2027.82	3.93374	1.9759	0.0022697
ENSSSCG00000023167	MFHAS1	69.4626	332.725	0.208772	-2.26	0.0030902	107.186	307.577	0.348493	-1.5208	0.013699
ENSSSCG00000004452	PRSS35	38.5964	185.06	0.208555	-2.2615	0.030444	705.268	171.546	4.11132	2.0396	0.0015342
ENSSSCG00000000289	NFE2	3.2894	16.1318	0.203909	-2.294	0.0086419	39.1208	14.9223	2.6217	1.3905	0.018255
Novel01287		14.4823	84.8942	0.170589	-2.5514	0.011403	217.391	78.7075	2.76197	1.4657	0.0090356
ENSSSCG00000025510		11.9268	71.779	0.166155	-2.5894	2.3512e-06	5.07267	66.4087	0.0763832	-3.7106	8.6076e-09
ENSSSCG00000000748	IQSEC3	18.0295	112.81	0.159818	-2.6455	0.00022513	22.8882	104.561	0.218893	-2.1917	0.0017681
ENSSSCG00000003690	DLGAP1	2.13575	13.6901	0.156009	-2.6803	0.0042611	1.99076	12.6771	0.15704	-2.6708	0.0050798
ENSSSCG00000013378	ABCC8	2.86486	22.7293	0.126044	-2.988	0.0014588	816.266	21.0543	38.7708	5.2769	0.0018761
Novel00535		19.535	159.153	0.122742	-3.0263	2.421e-07	21.9242	147.261	0.148878	-2.7478	2.9246e-07
ENSSSCG00000001397	TMP-CH242-74M17.4	10.7592	88.5204	0.121548	-3.0404	0.028976	6.95048	82.0639	0.0846938	-3.5616	0.013566
ENSSSCG00000003234		0.83801	8.65795	0.0967899	-3.369	0.011856	1.6408	8.02012	0.204589	-2.2892	0.049069
ENSSSCG00000029944		608.502	6554.51	0.0928342	-3.4292	0.013335	37469.6	6078.21	6.16457	2.624	0.0087644
ENSSSCG00000023044		698.803	8123.2	0.086025	-3.5391	0.02067	36671.5	7529.79	4.87026	2.284	0.021585
ENSSSCG00000011747	CLDN11	0.315636	6.33436	0.049828	-4.3269	0.013597	0.313132	5.87604	0.0532897	-4.23	0.018766
